# Supplementary material
Source: MDPI journal article supplement (https://www.mdpi.com/1424-2818/13/1/29)
Supplement: s1 [file s1]

**Table S1. Species table.** All current valid orbiniid species from the 20 accepted genera. For each species, the authority, the type locality, the distribution and the habitat where to find it is represented, when it has been possible to gather the information. The genera are ordered from the most to the least diverse one. The monotypic genera are ordered alphabetically. The first species from each genus list is the type species of the genus and, from that one, the rest are organized alphabetically. All valid sub-species are included in the table.

| Species                                  | Authority                            | Type locality                                                                                                      | Distribution                                                                                                                                                                      | Habitat                                                                            | References                                                                      |
|------------------------------------------|--------------------------------------|--------------------------------------------------------------------------------------------------------------------|-----------------------------------------------------------------------------------------------------------------------------------------------------------------------------------|------------------------------------------------------------------------------------|---------------------------------------------------------------------------------|
| <i>Leitoscoloplos bifurcatus</i>         | (Hartman, 1957) [1]                  | Encounter Bay, South Australia                                                                                     | Several localities from Australia, located in South Australia, Victoria, New South Wales, Queensland and Northern Territory; Solomon Islands, Papua New Guinea. Intertidal to 15m | Limestone reef among <i>Zostera</i> roots, pebbles and sand (in the type locality) | Hutchings & Rainer (1979) [2]; Zhadan et al. (2015) [3]                         |
| <i>Leitoscoloplos abbranchiatus</i>      | (Hartman, 1967) [4]                  | Off Cape Horn, Antarctic Sea, Wollaston Islands, 4008m.                                                            | Antarctic and subantarctic seas; 1400 - 5338m.                                                                                                                                    |                                                                                    | Mackie (1987) [5]; Blake (2017) [6]                                             |
| <i>Leitoscoloplos acutus</i>             | (Verrill, 1873) [7]                  | Off Gay Head and Vineyard Sound, Massachusetts, USA. Subtidal (35m)                                                | East coast of North America; Barents and White Seas. Between 6 and 200m.                                                                                                          | Mud                                                                                | Hartman (1948) [8]; Pettibone (1963) [9]; Mackie (1987) [5]; Zhadan (1998) [10] |
| <i>Leitoscoloplos bajacaliforniensis</i> | Leon-Gonzalez & Rodriguez, 1996 [11] | Western coast of Baja California Peninsula, Eastern Pacific Ocean, Mexico. Subtidal to continental shelf (85-223m) | Known only from the the type locality                                                                                                                                             | Silty and sandy sediments                                                          | Leon-Gonzalez & Rodriguez (1996) [11]                                           |
| <i>Leitoscoloplos bilobatus</i>          | Mackie, 1987 [5]                     | North Head, Sydney, Australia                                                                                      | New South Wales, Australia; subtidal (32 m.)                                                                                                                                      |                                                                                    | Mackie (1987) [5] and Blake (2017) [6]                                          |
| <i>Leitoscoloplos chilensis</i>          | (Hartman-Schröder, 1965) [12]        | Punta Iloca, Southeast Pacific, Chile                                                                              | Western Chile, intertidal to 50.; Straits of Magellan, 273-280m.                                                                                                                  | Silty fine sand with detritus                                                      | Hartmann-Schröder (1965) [12]; Mackie (1987) [5];                               |

|                                                                   |                                         |                                                                                                            |                                                                                                              |                                       |                                                                    |
|-------------------------------------------------------------------|-----------------------------------------|------------------------------------------------------------------------------------------------------------|--------------------------------------------------------------------------------------------------------------|---------------------------------------|--------------------------------------------------------------------|
| <i>Leitoscoloplos cliffordi</i>                                   | Blake, 2020 [13]                        | West of Farallon Islands, Eastern Pacific, Continental slope off northern California                       | Off northern California in lower continental slope depths, 2600-3136m.                                       | Sand and muddy sand                   | Blake (2017) [6]<br>Blake (2020) [13]                              |
| <i>Leitoscoloplos drakei</i>                                      | (Hartman, 1967) [4]                     | Drake Passage, Antarctic Sea, 3312-3532m.                                                                  | Type locality; Weddell Sea, 1622-4575m.; South African Basin, 4551m.                                         |                                       | Blake (2017) [6]                                                   |
| <i>Leitoscoloplos eltaninae</i><br><i>Leitoscoloplos foliosus</i> | Blake, 2017 [6]<br>(Hartman, 1951) [14] | North of Shag Rocks, South Atlantic Ocean, South Georgia Island<br>Turtle Bayou in Aransas Bay, Texas, USA | South Atlantic Ocean, 3742–3806 m.<br>East coast of USA, Gulf of Mexico and Caribbean Sea. Intertidal        |                                       | Blake (2017) [6]<br>Miloslavic et al. (2010) [15]; WoRMS 2020 [16] |
| <i>Leitoscoloplos fragilis</i>                                    | (Verrill, 1873) [7]                     | Great Egg Harbour, New Jersey; New Haven; Watch Hill; Wood's Hole, New England; USA. Intertidal            | East coast of North America and Gulf of Mexico; Brazil, South-West Atlantic. intertidal to shallow subtidal. | Sand                                  | Pagliosa et al. (2014) [17]; WoRMS 2020 [16]                       |
| <i>Leitoscoloplos geminus</i>                                     | Mackie, 1987 [5]                        | East end of Normanna Strait near Cape Hansen, Coronation Island, Antarctic Ocean                           | Widespread in Antarctica; shelf depths (20-220m.)                                                            | Volcanic mud in the Kerguelen Islands | Mackie (1987) [5]; Blake (2017) [6]                                |
| <i>Leitoscoloplos gordaensis</i>                                  | Blake, 2020 [13]                        | Escanaba Trough, Gorda Ridge, Eastern Pacific, off northern California                                     | Known only from the type locality, in the vicinity of hydrothermal vents, 3271m.                             |                                       | Blake (2020) [13]                                                  |
| <i>Leitoscoloplos kerguelensis</i>                                | (McIntosh, 1885) [18]                   | Off London River and off Christmass Harbour, Kerguelen Islands, Southern Indian Ocean                      | Antarctic and subantarctic seas; Doubtful reports in the Mediterranean and in India. Intertidal to 1400 m    |                                       | Mackie (1987) [5] and Blake (2017) [6]                             |
| <i>Leitoscoloplos latibranchus</i>                                | Day, 1977 [19]                          | Mouth of the Murray River, Long Bay, South Australia                                                       | Type locality and New South Wales, Australia; intertidal.                                                    |                                       | Mackie (1987) [5] and Blake (2017) [6]                             |
| <i>Leitoscoloplos lunulus</i>                                     | Blake, 2020 [13]                        | Off Half Moon Bay, Eastern Pacific, Continental slope off northern California                              | Off northern California, middle continental slope depths, 1020-1760m.                                        |                                       | Blake (2020) [13]                                                  |

|                                                                          |                                                                       |                                                                                                         |                                                                                                 |                                                                                |                                                                                                                |
|--------------------------------------------------------------------------|-----------------------------------------------------------------------|---------------------------------------------------------------------------------------------------------|-------------------------------------------------------------------------------------------------|--------------------------------------------------------------------------------|----------------------------------------------------------------------------------------------------------------|
| <i>Leitoscoloplos mackiei</i>                                            | Eibye-Jacobsen, 2002 [20]                                             | Thai sector of the Andaman Sea, Indian Ocean, Thailand                                                  | Indian Ocean, Andaman Sea, off Thailand, 21–66 m.                                               | Sandy mud, soft mud, fine sand or sand with shell fragments. Mud with detritus | Eibye-Jacobsen (2002) [20]                                                                                     |
| <i>Leitoscoloplos mammosus</i>                                           | Mackie, 1987 [5]                                                      | Upper Basin of Loch Creran, North Atlantic, Scotland                                                    | Type locality, subtidal (25m.); Hayes Peninsula, Greenland, subtidal (110m.)                    |                                                                                | Mackie (1987) [5]                                                                                              |
| <i>Leitoscoloplos mawsoni</i>                                            | (Benham, 1921) [21]                                                   | Port Lockroy, North Antarctica                                                                          | Southern Ocean: Adelie Land, Wilkes Land and Ross Sea. Intertidal to 25m.                       |                                                                                | Mackie (1987) [5]; Cantone et al. (2001) [22]; Blake (2017) [6]                                                |
| <i>Leitoscoloplos mexicanus</i><br><i>Leitoscoloplos multipapillatus</i> | (Fauchald, 1972) [23]<br>Hernández-Alcántara & Solís-Weiss, 2014 [24] | Off Isla las Animas, Gulf of California, Western Mexico<br>Tepoca Cape, northeastern Gulf of California | Gulf of California; 1378–1421 m.<br>Mexico, Baja California; Costa Rica, Pacific Coast; 9–54 m. | Sandy mud and fine sand.                                                       | Mackie (1987) [5]<br>Hernández-Alcántara & Solís-Weiss (2014) [24]; Dean & Blake (2015) [25]; Blake (2017) [6] |
| <i>Leitoscoloplos nasus</i>                                              | Blake, 2017 [6]                                                       | Off Antarctic Peninsula, 128–165 m.                                                                     | Known only from the type locality, subtidal (128–165 m.)                                        |                                                                                | Blake (2017) [6]                                                                                               |
| <i>Leitoscoloplos obovatus</i>                                           | Mackie, 1987 [5]                                                      | Woods Hole Oceanographic Institution, off New England, USA                                              | East coast of North America; 300 m.                                                             |                                                                                | Mackie (1987) [5] and Blake (2017) [6]                                                                         |
| <i>Leitoscoloplos olei</i>                                               | Neal & Paterson in Neal et al., 2020 [26]                             | Sea Lion oil field, North Falklands Basin, South Atlantic Ocean                                         | Known only from the type locality, 450 m                                                        | In oil fields (type of sediment not stated)                                    | Neal et al. (2020) [26]                                                                                        |
| <i>Leitoscoloplos pachybranchiatus</i>                                   | Blake & Hilbig, 1990 [27]                                             | Juan de Fuca ridge, off Washington, NE Pacific                                                          | Known only from the the type locality, 2216 m                                                   | Hydrothermal vents                                                             | Blake & Hilbig (1990) [27]                                                                                     |

|                                      |                           |                                                                                                                                                        |                                                                                                                             |                                                                          |                                                                           |
|--------------------------------------|---------------------------|--------------------------------------------------------------------------------------------------------------------------------------------------------|-----------------------------------------------------------------------------------------------------------------------------|--------------------------------------------------------------------------|---------------------------------------------------------------------------|
| <i>Leitoscoloplos panamensis</i>     | (Monro, 1933) [28]        | Taboga Island, Panamá, Pacific Ocean                                                                                                                   | From Northern California to Pacific Panamá; intertidal to 46 m.                                                             | Mud, muddy sand, fine sand, sand and among mangrove roots                | Hernández-Alcántara & Solís-Weiss (2014) [24]                             |
| <i>Leitoscoloplos papillatus</i>     | Eibye-Jacobsen, 2002 [20] | Thai sector of the Andaman Sea, Indian Ocean, Thailand                                                                                                 | Indian Ocean, Andaman Sea off Thailand; 17–79 m.                                                                            | Mud, sandy mud, soft mud or sand with shell fragments.                   | Eibye-Jacobsen (2002) [20]                                                |
| <i>Leitoscoloplos phyllobranchus</i> | Blake, 2017 [6]           | Arthur Harbour, Anvers Island, Antarctic Peninsula                                                                                                     | Antarctic Peninsula, subtidal (40 m.)                                                                                       |                                                                          | Blake (2017) [6]                                                          |
| <i>Leitoscoloplos plataensis</i>     | Blake, 2017 [6]           | Off the mouth of the Rio de la Plata, Southwest Atlantic, Uruguay                                                                                      | Uruguay and Argentina; intertidal to subtidal (144m.)                                                                       | Gravel                                                                   | Blake (2017) [6]                                                          |
| <i>Leitoscoloplos pugettensis</i>    | (Pettibone, 1957) [29]    | Washington and Puget Sounds, North Pacific, Washington                                                                                                 | West coast of North America (Alaska to Costa Rica); intertidal to moderate depths.                                          | Mud, sand and gravelly-sand                                              | Pettibone (1957) [29]; Blake (1996) [30]                                  |
| <i>Leitoscoloplos rankini</i>        | Blake, 2017 [6]           | Drake Passage and Weddell Sea, Antarctic Sea                                                                                                           | Known only from the type locality, 1622 - 3959 m                                                                            |                                                                          | Blake (2017) [6]                                                          |
| <i>Leitoscoloplos robustus</i>       | (Verrill, 1873) [7]       | Great Egg Harbour, New Jersey; New Haven; Watch Hill; Wood's Hole, New England; USA. Shallow water                                                     | East coast of North America, Gulf of Mexico and Caribbean Sea; Brazil, South-West Atlantic. intertidal to shallow subtidal. | Sand                                                                     | Miloslavic et al. (2010) [15]                                             |
| <i>Leitoscoloplos sahlingi</i>       | Blake, 2020 [13]          | Southern summit of Hydrate Ridge, Cascadia Subduction Zone, Continental margin off Oregon                                                              | Known only from the type locality, in sediments with gas hydrates, 786m.                                                    |                                                                          | Blake (2020) [13]                                                         |
| <i>Leitoscoloplos simplex</i>        | Blake, 2017 [6]           | Clarion-Clipperton Fracture Zone, North equatorial Pacific Ocean                                                                                       | Known only from the type locality, abyssal plain (4843m.)                                                                   |                                                                          | Blake (2017) [6]                                                          |
| <i>Leitoscoloplos williamsae</i>     | Blake, 2020 [13]          | Off Half Moon Bay, Eastern Pacific, Continental slope off northern California                                                                          | Off northern California, middle continental slope depths, 1760m.                                                            |                                                                          | Blake (2020) [13]                                                         |
| <i>Leodamas verax</i>                | Kinberg, 1866 [31]        | Horn Island, Wollaston Islands, Chile, Drake passage, 62m. Neotype designated by Blake (2017) from Las Grutas, Argentina, intertidal under mussel bed. | Type locality, Uruguay, Argentina and Brazil. Intertidal to 62m.                                                            | Sand with shells, sandy mud, sandy gravel or intertidal under mussel bed | Hartman (1957) [1]; Lana et al. (2006) [32]; Pagliosa et al. (2012) [33]; |

|                                                          |                                               |                                                                                                                                           |                                                                                                                |                                                                                                                                                         |                                                                                                                                   |
|----------------------------------------------------------|-----------------------------------------------|-------------------------------------------------------------------------------------------------------------------------------------------|----------------------------------------------------------------------------------------------------------------|---------------------------------------------------------------------------------------------------------------------------------------------------------|-----------------------------------------------------------------------------------------------------------------------------------|
| <i>Leodamas acutissimus</i>                              | (Hartmann-Schröder, 1991) [34]                | Gladstone, Queensland, Coral Sea, Australia                                                                                               | Gladstone and Lizard Island, Queensland, Australia                                                             |                                                                                                                                                         | Blake (2017) [6]<br>Hartmann-Schröder (1991) [34]; Zhadan et al. (2015) [3]; Blake (2017) [6]                                     |
| <i>Leodamas agrestis</i>                                 | (Nonato & Luna, 1970) [35]                    | From Maceió to Aracaju, North-East Brazil, 20-50m                                                                                         | Off Brazil, 2-100m.                                                                                            | Mud or mud with detritus                                                                                                                                | Nonato & Luna (1970) [35]; Blake (2017) [6]                                                                                       |
| <i>Leodamas bathyalis</i><br><i>Leodamas brevithorax</i> | Blake, 2020 [13]<br>Eibye-Jacobsen, 2002 [20] | Off Brunei, Island of Borneo, South China Sea, 1260-1557m<br>Thai sector of the Andaman Sea, Indian Ocean, 17-79m                         | Known only from the type locality<br>Known only from the type locality                                         | Sandy mud (also with shell fragments), mud (also with shell fragments), soft mud (also with shell fragments) or sand with shell fragments<br>Muddy sand | Blake (2020) [13]<br>Eibye-Jacobsen (2002) [20]; Blake (2017) [6]                                                                 |
| <i>Leodamas chevalieri</i>                               | (Fauvel, 1902) [36]                           | Estuary of Casamance River, Senegal, at 6km from the mouth, in intertidal fine sand, slightly muddy, around rotten wood and other debris. | West Africa; Red Sea, Gulf of Aden, Persian Gulf; Teluk Aling, Penang, Malacca Strait, Malaysia; Indian Ocean. |                                                                                                                                                         | Fauvel (1902 and 1953) [36,37]; Gravier (1906) [38]; Wesenberg-Lund (1949) [39]; Ehlers (1900 and 1901) [40,41]; Blake (2017) [6] |

|                                                        |                                         |                                                                                                       |                                                                                                                            |                                                                                             |                                                                                                             |
|--------------------------------------------------------|-----------------------------------------|-------------------------------------------------------------------------------------------------------|----------------------------------------------------------------------------------------------------------------------------|---------------------------------------------------------------------------------------------|-------------------------------------------------------------------------------------------------------------|
| <i>Leodamas chevalieri candiensis</i>                  | Harmelin, 1969 [42]                     | Kalo-Limniones, Creta, Eastern Mediterranean Sea. Subtidal (7m)                                       | Aegean Sea, between 7-11m                                                                                                  | Sandy bottoms among the sea-grasses <i>Cymodocea nodosa</i> and <i>Halophila stipulacea</i> | Faulwetter (2017) [43]                                                                                      |
| <i>Leodamas cirratus</i>                               | (Ehlers, 1897) [44]                     | Vicinity of the Falkland Islands off southern South America, in shallow depths to 113m.               | SE Argentina; Falkland Islands; Straits of Magellan; South Orkney Islands; Paraná State, Brazil. Shallow subtidal to 598m. |                                                                                             | Ehlers (1897 and 1901) [41,44]; Hartman (1957) [1]; Lana et al. (2006) [32]; Blake (2017) [6]               |
| <i>Leodamas cochleatus</i>                             | (Ehlers, 1900) [40]                     | Tribune Bank, Straits of Magellan, Chile, 46m.                                                        | Offshore Argentina, E of Mar de la Plata, 454m.; Straits of Magellan, Chile, 46m.                                          | Sand or gravel                                                                              | Ehlers (1900 and 1901) [40,41]; Blake (2017) [6]                                                            |
| <i>Leodamas cylindrifera</i>                           | (Ehlers, 1904) [45]                     | Durville Island, South Island of New Zealand; Maunganui, Chatham Island, New Zealand                  | New Zealand; South Australia. Intertidal                                                                                   |                                                                                             | Ehlers (1904) [45]; Augener (1914) [46]; Hartman (1957) [1]; Day (1977) [19]; Hartmann-Schröder (1981) [47] |
| <i>Leodamas dendrocirris</i><br><i>Leodamas dubius</i> | (Day, 1977) [19]<br>(Tebble, 1955) [48] | 6km E of Malabar, New South Wales, Australia, 65m<br>Gold Coast, Ghana, West Africa. Subtidal (3-11m) | Known only from the type locality<br>West Africa, 3-11m.; Thailand, Vietnam, NW Australia, Queensland, 19-79m              | Sand or mud, with or without shell fragments                                                | Day (1977) [19]<br>Tebble (1955) [48]; Eibye-Jacobsen (2002) [20]; Zhadan et al. (2015) [3]                 |

|                                 |                         |                                                                                 |                                                                                                                                                   |                                              |                                                                              |
|---------------------------------|-------------------------|---------------------------------------------------------------------------------|---------------------------------------------------------------------------------------------------------------------------------------------------|----------------------------------------------|------------------------------------------------------------------------------|
| <i>Leodamas frimbriatus</i>     | (Hartman, 1957) [1]     | Corney Point and Troubridge Beach, Yorke Peninsula, South Australia. Intertidal | South Australia. Intertidal                                                                                                                       | Sand                                         | Hartman (1957) [1]; Day (1977) [19]                                          |
| <i>Leodamas gracilis</i>        | (Pillai, 1961) [49]     | Tambalagam Lake, Ceylon, Sri Lanka. Subtidal (19-38m.)                          | Nha Trang, South Vietnam; Tambalagam Lake, Ceylon, Sri Lanka; Andaman Sea; Brazil, South-West Atlantic. Subtidal (19–38 m.)                       | Sand or mud, with or without shell fragments | Pillai (1961) [49]; Gallardo (1968) [50]; Eibye-Jacobsen (2002) [20]         |
| <i>Leodamas hamatus</i>         | Dean & Blake, 2015 [25] | Gulf of Nicoya, 11-26m and Bahía Culebra, 12-13m, Costa Rica                    | Known only from the type locality                                                                                                                 | Mud or sand                                  | Dean & Blake (2015) [25]                                                     |
| <i>Leodamas hyphalos</i>        | Blake, 2017 [6]         | Drake Passage in deep water; 2888–4008 m.                                       | Known only from the type locality                                                                                                                 |                                              | Blake (2017) [6]                                                             |
| <i>Leodamas johnstonei</i>      | (Day, 1934) [51]        | St. James, False Bay, Cape Town, South Africa. Intertidal                       | SW and South Africa; Mozambique; intertidal.—Australia, Victoria, New South Wales, and Queensland; Brazil, South-West Atlantic                    | Sandy mud                                    | Day (1934, 1967 and 1977) [19,51,52]; Hartman (1957) [1]                     |
| <i>Leodamas latum</i>           | (Chamberlin, 1919) [53] | Off Pacific Panama, green mud, 588m.                                            | Type locality; Akyab, off Burma, 457 m.                                                                                                           | Mud                                          | Chamberlin (1919) [53]; Fauvel (1932) [54]; Hartman (1957) [1]               |
| <i>Leodamas maciolekae</i>      | Blake, 2017 [6]         | Mar del Plata, Argentina, 14m.                                                  | Argentina, 14m.                                                                                                                                   |                                              | Blake (2017) [6]                                                             |
| <i>Leodamas madagascarensis</i> | Fauvel, 1919 [55]       | The Tuléar reef, Madagascar, intertidal                                         | Type locality; West Africa: Mauritania, Gulf Guinea and Angola; Brazil, South-West Atlantic, subtidal to about 99m                                |                                              | Fauvel (1919) [55]; Day (1951 and 1967) [52,56]; Pagliosa et al. (2014) [17] |
| <i>Leodamas marginatus</i>      | (Ehlers, 1897) [44]     | South Georgian part of the Antarctic Sea                                        | South America: Straits of Magellan, Patagonian regions and north Argentina; Falkland Islands; sub-Antarctic latitudes off SE Argentina and SE New |                                              | Ehlers (1897) [44]; Hartman (1957 and 1966) [1,57]; Knox (1998) [58];        |

|                                                                      |                                                                 |                                                                                                                                                          |                                                                                                                                                          |                                                                               |                                                                                                      |
|----------------------------------------------------------------------|-----------------------------------------------------------------|----------------------------------------------------------------------------------------------------------------------------------------------------------|----------------------------------------------------------------------------------------------------------------------------------------------------------|-------------------------------------------------------------------------------|------------------------------------------------------------------------------------------------------|
| <i>Leodamas mazatlanensis</i><br><i>Leodamas minutus</i>             | (Fauchald, 1972) [59]<br>Lopez, Cladera & San Martín, 2003 [60] | Mazatlan Basin and off Cabo Corrientes, Western Mexico, 2487–2560 m<br>Santa Cruz Beach and El Gambute Beach, Panama Bay, North-East Pacific. Intertidal | Zealand; Antarctic Peninsula; Ross Sea; Weddell Sea; Intertidal to 1674 m.<br><br>Known only from the type locality<br>Known only from the type locality | <br><br>Fine, medium, silty or coarse sand. Upper, middle or lower intertidal | Pagliosa et al. (2014) [17];<br>Blake (2017) [6]<br>Fauchald (1972) [59]<br>Lopez et al. (2003) [60] |
| <i>Leodamas orientalis</i>                                           | (Gallardo, 1968) [50]                                           | Nha Trang, South Vietnam, 8-19m.                                                                                                                         | Type locality; Andaman Sea, 21–79 m.                                                                                                                     | Sandy mud, red or fine sand (with or without shell debris)                    | Gallardo (1968) [50]; Eibye-Jacobsen (2002) [20]<br>Blake (2017) [6]                                 |
| <i>Leodamas perissobranchiatus</i><br><i>Leodamas playthoracicus</i> | Blake, 2017 [6]<br><br>Lopez, Cladera & San Martín, 2003 [60]   | Off Valparaiso, Western Chile, 192m.<br><br>El Gambute Beach and Santa Cruz Beach, Pacific Panama, intertidal                                            | Known only from the type locality<br><br>Known only from the type locality                                                                               | <br><br>Coarse, silty and fine sand. Middle and upper intertidal.             | <br><br>Lopez et al. (2003) [60]                                                                     |
| <i>Leodamas rubrus</i>                                               | (Webster, 1879) [61]                                            | Northampton County, North-West Atlantic, Virginia, intertidal                                                                                            | E and SE United States; Gulf of Mexico; Paraná State, Brazil. intertidal to 200 m.                                                                       | Mud or sandy mud                                                              | Webster (1879) [61]; Hartman (1951 and 1957) [1,14]; Taylor (1984) [62]; Lana et al. (2006) [32]     |
| <i>Leodamas sinensis</i><br><i>Leodamas texana</i>                   | Sun, Sui & Li, 2018 [63]<br>Maciolek & Holland, 1978 [64]       | Yellow Sea (53-69m) and East China Sea (47-75m)<br>Corpus Christi and Redfish Bays, Gulf of Mexico, Texas                                                | Known only from the type locality<br>Gulf of Mexico, Caribbean Sea and Brazil, South-West Atlantic, in very shallow subtidal (1.6 to 5m.)                | Sandy mud or mud<br>Clay or muddy sand with slight to large amounts of shell  | Sun, Sui & Li (2018) [63]<br>Maciolek & Holland (1978) [64]; Taylor (1984) [62];                     |



|                                                         |                                             |                                                                                                                                                        |                                                                                                                   |                                                     |                                                                                                                                                                                                                                                                                                                  |
|---------------------------------------------------------|---------------------------------------------|--------------------------------------------------------------------------------------------------------------------------------------------------------|-------------------------------------------------------------------------------------------------------------------|-----------------------------------------------------|------------------------------------------------------------------------------------------------------------------------------------------------------------------------------------------------------------------------------------------------------------------------------------------------------------------|
| <i>Leodamas thalassae</i><br><i>Leodamas treadwelli</i> | (Amoureux, 1982) [66]<br>(Eisig, 1914) [67] | NE Atlantic, off Brittany coast of France, 850–1400 m.<br>Off Puerto Rico, in 22-33m with mud and shale, 294-315m., sand and mud, and 177-219m., coral | Known only from the type locality<br>Caribbean; Puerto Rico; NE Colombia; Pacific Mexico, 6–315 m                 | Sand and mud                                        | Granados-Barba & Solís-Weiss (1997) [65]; Miloslavich et al. (2010) [15]; Pagliosa et al. (2014) [17]; Blake (2017) [6]<br>Amoureux (1982) [66]<br>Treadwell (1901) [68]; Hartman (1957) [1]; Maciolek & Holland (1978) [64]; de Leon-González & Rodríguez (1996) [11]; Granados-Barba & Solís-Weiss (1997) [65] |
| <i>Leodamas tribulosus</i>                              | (Ehlers, 1897) [44]                         | Tierra del Fuego, Argentina, intertidal                                                                                                                | Western South America, Patagonia; Argentina; intertidal to shallow subtidal                                       | Sand                                                | Ehlers (1897) [44]; Blake (2017) [6]                                                                                                                                                                                                                                                                             |
| <i>Scoloplos armiger complex</i>                        | (Müller, 1776) [69]                         | Kristiansand, North Sea, Norway                                                                                                                        | world-wide, intertidal to about 2455m                                                                             | Wide range of sediment types, from mud to fine sand | Holtmann et al. (1996) [70]; Bleidorn et al. (2006) [71]; WoRMS [16]                                                                                                                                                                                                                                             |
| <i>Scoloplos acmeceps</i>                               | Chamberlin, 1919 [53]                       | Laguna Beach, Pacific Ocean, California                                                                                                                | Widespread in the eastern Pacific, Alaska to Mexico; Gulf of Mexico. Intertidal and very shallow subtidal depths. | Mud or among seagrasses                             | Blake (1996) [30]; Fauchald et al. (2009) [72]                                                                                                                                                                                                                                                                   |

|                                      |                              |                                                                                                          |                                                                                                                         |            |                                                                                                                                       |
|--------------------------------------|------------------------------|----------------------------------------------------------------------------------------------------------|-------------------------------------------------------------------------------------------------------------------------|------------|---------------------------------------------------------------------------------------------------------------------------------------|
| <i>Scoloplos acmeiceps profundus</i> | Hartman, 1960 [73]           | Cortez Basin, Pacific Ocean, Southern California                                                         | Deep basin of Southern California (>1500m.)                                                                             | muddy sand | Blake (1996) [30]                                                                                                                     |
| <i>Scoloplos bathytatus</i>          | Blake, 2017 [6]              | Drake Passage, near South Orkney Islands, near South Georgia and Weddell Sea, Antarctic Peninsula        | Off South America, in subantarctic areas from the Drake Passage to South Georgia, 2800–3463 m; Weddell Sea, 650–3111 m. |            | Blake (2017) [6]                                                                                                                      |
| <i>Scoloplos californiensis</i>      | Blake, 2020 [13]             | Off northern California, off Half Moon Bay, north and south of Pioneer Canyon, North Pacific, California | Known only from the type locality, continental slope, 1730-1880m.                                                       |            | Blake (2020) [13]                                                                                                                     |
| <i>Scoloplos capensis</i>            | (Day, 1961) [74]             | Agulhas Bank, South Africa, deep-sea. Depth and bottom type not specified in the original description.   | Type locality; Caribbean Sea; Gulf of Mexico; East Coast of USA, North-West Atlantic; Bay of Bengal, India              |            | Raman & Ganapati (1977) [75]; Wolff et al. (1993) [76]; Fauchald et al. (2009) [72]; Miloslavich (2010) [15]; Pati et al. (2015) [77] |
| <i>Scoloplos chrysochaeta</i>        | Wu, 1962 [78]                | Yantai, Yellow Sea, China                                                                                | Known only from the type locality                                                                                       |            | Wu, 1962 [78]                                                                                                                         |
| <i>Scoloplos cryptospinigerus</i>    | Dean & Blake, 2015 [25]      | Gulf of Nicoya, North Pacific, Costa Rica                                                                | Gulf of Nicoya, Pacific Costa Rica, in muddy sand from 18-22m.                                                          |            | Dean & Blake (2015) [25]                                                                                                              |
| <i>Scoloplos dayi</i>                | Hartmann-Schröder, 1980 [79] | Exmouth: Town Beach, Western Australia                                                                   | Northwest coast of Australia, Lizard Island, Queensland                                                                 |            | Zhadan et al. (2015) [3]                                                                                                              |
| <i>Scoloplos depoorteri</i>          | Jeldes & Lefevre, 1959 [80]  | Cove of Tonde, North Atlantic Ocean, West Africa                                                         | Western Africa, very shallow subtidal (1m)                                                                              |            | Jeldes & Lefevre (1959) [80]                                                                                                          |
| <i>Scoloplos ehlersi</i>             | Blake, 1985 [81]             | Galapagos rift area, Pacific Ocean                                                                       | Galapagos rift area, vicinity of geothermal vents but not                                                               |            | Blake (1985) [81]                                                                                                                     |

|                                     |                                                                          |                                                                                       |                                                                                                                            |                                                |                                                              |
|-------------------------------------|--------------------------------------------------------------------------|---------------------------------------------------------------------------------------|----------------------------------------------------------------------------------------------------------------------------|------------------------------------------------|--------------------------------------------------------------|
| <i>Scoloplos haasi</i>              | (Monro, 1937) [82]                                                       | Between Acre and Jaffa, Mediterranean Sea, Palestine. Intertidal                      | associated with the vent community 2730m<br>North Western and Eastern Spain, Greece and Palestine, intertidal and subtidal | Sand and fine sand                             | Monro (1937) [82]; Faulwetter (2017) [43]; López (2012) [83] |
| <i>Scoloplos intermedius</i>        | (Hartman, 1965) [84]                                                     | Off New England and Bermuda                                                           | Off New England, from 300 to 3752m.; Off Bermuda, in 1000m; questionably abyssal.                                          |                                                | Hartmann (1965) [84]                                         |
| <i>Scoloplos juanfernandezensis</i> | Rozbaczylo, Díaz-Díaz & Cataldo, 2017 [85]                               | Robinson Crusoe Island, Juan Fernández Archipelago, Southeastern Pacific Ocean        | Only known from the type locality, shallow subtidal (4-10m)                                                                | Sand in hard bottom.                           | Rozbaczylo et al. (2017) [85]                                |
| <i>Scoloplos maranhensis</i>        | Oliveira, Cutrim, Vieira, Ferreira, Almeida & Nogueira Júnior, 2019 [86] | Quebra Pote mangrove, São Luís, State of Maranhão, Brazil, Atlantic Ocean. Intertidal | Known only from the type locality                                                                                          | Muddy mangrove                                 | Oliveira et al. (2019) [86]                                  |
| <i>Scoloplos marsupialis</i>        | (Southern, 1921) [87]                                                    | Chilka Lake, Indian Ocean, India                                                      | India, Sri Lanka, Mozambique, Vietnam and China                                                                            | No information on depth neither habitat        | Mackie (1991) [88]                                           |
| <i>Scoloplos normalis</i>           | (Day, 1977) [19]                                                         | Hunter River, Tasmanian Sea, South-East Australia                                     | Different locations around South-East, South-West and North Australia                                                      |                                                | Day (1977) [19]                                              |
| <i>Scoloplos novaehollandiae</i>    | (Kinberg, 1866) [31]                                                     | New South Wales, Tasmanian Sea, Australia                                             | Known only from the type locality                                                                                          |                                                | Kinberg (1866) [31]                                          |
| <i>Scoloplos pseudosimplex</i>      | Eibye-Jacobsen, 2002 [20]                                                | Thai sector of the Andaman Sea, Thailand                                              | Known only from the type locality, in subtidal (17-59m)                                                                    | Sand and mud, with or without shell fragments. | Eibye-Jacobsen (2002) [20]                                   |
| <i>Scoloplos robustus</i>           | Rullier, 1964 [89]                                                       | Kribi, Gulf of Guinea, Cameroon                                                       | Continental shelf off Cameroon and Western Atlantic Ocean, in subtidal (45-50m)                                            |                                                | Rullier (1964) [89]; Hernández-                              |

|                                |                        |                                                                                                         |                                                                                                                                            |                                                             |                                                                                |
|--------------------------------|------------------------|---------------------------------------------------------------------------------------------------------|--------------------------------------------------------------------------------------------------------------------------------------------|-------------------------------------------------------------|--------------------------------------------------------------------------------|
| <i>Scoloplos sagarensis</i>    | Misra, 1999 [91]       | Gangasagar, Sagar Island, Bay of Bengal, India                                                          | Known only from the type locality                                                                                                          | Fine sand mixed with silt                                   | Alcántara et al. (2014) [90]                                                   |
| <i>Scoloplos similis</i>       | Mackie, 1987 [5]       | Off the south coast of Cape Province, South Africa, deep subtidal (124m.)                               | Known only from the type locality                                                                                                          |                                                             | Mirsa (1999) [91]                                                              |
| <i>Scoloplos simplex</i>       | (Hutchings, 1974) [92] | Wallis Lake, Tasmanian Sea, New South Wales                                                             | Along coast of Queensland, New South Wales, Victoria and Western Australia, intertidal                                                     | Sand                                                        | Mackie (1987) [5]                                                              |
| <i>Scoloplos sparsaciculus</i> | Blake, 2020 [13]       | Off Brunei, South China Sea, Island of Borneo                                                           | known only from the type locality, continental slope, 1260-1557m                                                                           |                                                             | Hutchings (1974) [92], Day (1977) [19] and Brown (1979) [93]                   |
| <i>Scoloplos spinigerus</i>    | Gallardo, 1968 [50]    | Nha Trang, South Vietnam. Subtidal (20m).                                                               | Known only from the type locality                                                                                                          | Fine sand or sand with shell debris                         | Blake (2020) [13]                                                              |
| <i>Scoloplos suroestense</i>   | Blake, 2017 [6]        | Juan Fernandez Islands, Chile Bay, South Pacific, Chile                                                 | Juan Fernandez Islands, shallow subtidal (<5m)                                                                                             |                                                             | Gallardo (1968) [50]                                                           |
| <i>Scoloplos tumidus</i>       | Mackie, 1991 [88]      | Three Fathoms Cove, Xina Sea, Hong Kong. Intertidal                                                     | Known only from the type locality                                                                                                          | Silty fine sand                                             | Blake (2017) [6]                                                               |
| <i>Scoloplos typicus</i>       | (Eisig, 1914) [67]     | In front of Villa Rendel and Donn'Anna, Posillipo, Gulf of Naples, Tyrrhenian Sea, Italy. Subtidal (8m) | Western Mediterranean, Adriatic Sea, Aegean Sea and North Atlantic Sea (Portugal and north of Spain). Subtidal to 30m                      | Sand                                                        | Mackie (1991) [88]                                                             |
| <i>Scoloplos uschakovi</i>     | Wu, 1962 [78]          | Tangu and Tianjin, Bohai Sea, and Tsindao, Yellow Sea, Xina                                             | Known only from the type locality                                                                                                          |                                                             | Day (1973) [94]; Bellan (2001) [95]; Faulwetter (2017) [43]; López (2012) [83] |
| <i>Orbinia sertulata</i>       | (Savigny, 1822) [96]   | La Rochelle, North-East Atlantic, France                                                                | North-East Atlantic, Irish Sea and English Channel; North Sea; Norwegian Sea; Mediterranean, Adriatic and Aegean Seas. Intertidal to 240m. | Sand, sandy mud, mud and also in the sediment between brown | Wu (1962) [78]                                                                 |
|                                |                        |                                                                                                         |                                                                                                                                            |                                                             | Kirkegaard (1996) [97]; Faulwetter (2017) [43]; López (2012)                   |

|                               |                           |                                                                           |                                                                                             |                                                           |                                                                          |
|-------------------------------|---------------------------|---------------------------------------------------------------------------|---------------------------------------------------------------------------------------------|-----------------------------------------------------------|--------------------------------------------------------------------------|
| <i>Orbinia americana</i>      | Day, 1973 [94]            | Off Beaufort, North Carolina, USA, 122m.                                  | Western North Atlantic, From North Carolina to Gulf of Mexico. Subtidal (122m.)             | algae and oyster banks.<br>Sand                           | [83]; WoRMS [16]<br>Fauchald et al. (2009) [72] and Sun & Li (2018) [98] |
| <i>Orbinia angrapequensis</i> | (Augener, 1918) [99]      | Luderitz, South West Africa                                               | Western Africa: Type locality and Knysna Estuary, Langebaan Lagoon; West India, Arabian Sea |                                                           | Day (1955) [100]; Pati (2015) [77]; Sun & Li (2018) [98]                 |
| <i>Orbinia armandi</i>        | (McIntosh, 1910) [101]    | St. Magnus Bay, Shetland, 146m.                                           | Known only from the type locality, North Sea and Skagerrak. Subtidal (143m.)                |                                                           | McIntosh (1910) [101]; Sun & Li (2018) [98]                              |
| <i>Orbinia bioreti</i>        | (Fauvel, 1919) [55]       | Sarodrano, Tuléar Province, Mozambique Channel, Madagascar                | Type locality and Bay Of Biscay, North-East Atlantic. Intertidal                            | Sand                                                      | Fauvel (1919 and 1927) [55,102]; Sun & Li (2018) [98]                    |
| <i>Orbinia camposiensis</i>   | Leão & Santos, 2016 [103] | Rio de Janeiro State, South-West Atlantic, Brazil                         | South-East Brazil, 25-50m.                                                                  |                                                           | Leão & Santos (2016) [103]                                               |
| <i>Orbinia cornidei</i>       | (Rioja, 1934) [104]       | Marín, Ria de Pontevedra, North-East Atlantic, Spain                      | Galicia, North-East Atlantic, Spain. Intertidal                                             | Sandy mud or fine sand                                    | Sun & Li (2018) [98]                                                     |
| <i>Orbinia dicrochaeta</i>    | Wu, 1962 [78]             | Zhifu Island, Yantai and Zhanshan, Qingdao, Yellow Sea, China. Intertidal | Type locality, East China Sea and South China Sea, intertidal to 37m.                       | Fine sand, sand, hard mud, brown silty sand or black sand | Sun & Li (2018) [98]                                                     |
| <i>Orbinia dubia</i>          | Day, 1955 [100]           | Langebaan, South Africa. Intertidal                                       | Known only from the type locality                                                           |                                                           | Day (1955) [100]; Sun & Li (2018) [98]                                   |
| <i>Orbinia hartmanae</i>      | Day, 1977 [19]            | Moreton Bay (10-37m.) and Malabar (60m.), Australia                       | Known only from the type locality                                                           |                                                           | Day (1977) [19]; Sun & Li (2018)                                         |

|                               |                                         |                                                                                               |                                                                                                                |                        |                                                                            |
|-------------------------------|-----------------------------------------|-----------------------------------------------------------------------------------------------|----------------------------------------------------------------------------------------------------------------|------------------------|----------------------------------------------------------------------------|
| <i>Orbinia edwardsi</i>       | (McIntosh, 1910) [101]                  | Busta Voe, Shetland Islands, NE Atlantic. Subtidal (73m)                                      | Known only from the type locality                                                                              |                        | McIntosh (1910) [101]; WoRMS [16]                                          |
| <i>Orbinia exarmata</i>       | (Fauvel, 1932) [54]                     | Bay of Bengal, India                                                                          | Known only from the type locality                                                                              |                        | Sun & Li (2018) [98]                                                       |
| <i>Orbinia glebushki</i>      | Averincev, 1990 [105]                   | Laptev Sea, Arctic Ocean, Russia                                                              | Known only from the type locality                                                                              |                        | Sun & Li (2018) [98]                                                       |
| <i>Orbinia johnsoni</i>       | (Moore, 1909) [106]                     | Moss Beach, near Monterey, North-East Pacific, California. Intertidal                         | Type locality and Campos Basin, Rio de Janeiro, South-East Brazil, 21-50m.                                     |                        | Moore (1909) [106] and Leão & Santos (2016) [103]                          |
| <i>Orbinia latreillii</i>     | (Audouin & H Milne Edwards, 1833) [107] | La Rochelle, North-East Atlantic, France                                                      | Western South Atlantic, Brazil; Eastern North Atlantic; English Channel; Mediterranean, Aegean Sea. Intertidal | Sand and mud           | Lana et al. (2006) [32]; Pagliosa et al. (2012) [33]; Sun & Li (2018) [98] |
| <i>Orbinia monroi</i>         | Day, 1955 [100]                         | Knysna Estuary, Western Cape Province, South-West Indian Ocean, South Africa                  | Type locality and Mozambique                                                                                   | Sandy mud              | Sun & Li (2018) [98]                                                       |
| <i>Orbinia oligopapillata</i> | López, Cladera & San Martín, 2006 [108] | Northern side of Santa Cruz Beach, Coiba Island, North-East Pacific, Panama. Lower intertidal | Type locality and Campos Basin, Rio de Janeiro, South-East Brazil, 22-100m.                                    | Fine or coarse sand    | López, Cladera & San Martín (2006) [108]; Leão & Santos (2016) [103]       |
| <i>Orbinia orensanzi</i>      | Blake, 2017 [6]                         | Las Grutas, Golfo San Matías and San Ramón, Golfo San José, SW Atlantic, Argentina            | Argentina, intertidal in sand beaches                                                                          | Sand                   | Blake (2017) [6]                                                           |
| <i>Orbinia papillosa</i>      | (Ehlers, 1907) [109]                    | Waiheke, Auckland Harbour, New Zealand. Intertidal                                            | New Zealand                                                                                                    | Fine or very fine sand | Ehlers (1907) [109]; Estcourt (1967) [110]; Sun & Li (2018) [98]           |
| <i>Orbinia riseri</i>         | (Pettibone, 1957) [29]                  | Woods Hole, Massachusetts, USA                                                                | Massachusetts to the Gulf of Mexico. Intertidal to 160m.                                                       |                        | Day (1973) [94]; Sun & Li (2018) [98]                                      |

|                               |                           |                                                                                                                                                                |                                                                                                                                                                                                                                                                                           |                                                                                                     |                                                         |
|-------------------------------|---------------------------|----------------------------------------------------------------------------------------------------------------------------------------------------------------|-------------------------------------------------------------------------------------------------------------------------------------------------------------------------------------------------------------------------------------------------------------------------------------------|-----------------------------------------------------------------------------------------------------|---------------------------------------------------------|
| <i>Orbinia sagitta</i>        | Leão & Santos, 2016 [103] | Rio de Janeiro State, South-West Atlantic, Brazil                                                                                                              | South-East Brazil, 400m.                                                                                                                                                                                                                                                                  |                                                                                                     | Leão & Santos (2016) [103]                              |
| <i>Orbinia swani</i>          | Pettibone, 1957 [29]      | York Beach, Maine, USA. Intertidal                                                                                                                             | North-West Atlantic: From Gulf of St. Lawrence to Massachusetts                                                                                                                                                                                                                           |                                                                                                     | Sun & Li (2018) [98]                                    |
| <i>Orbinia vietnamensis</i>   | Gallardo, 1968 [50]       | Nha Trang, Xina Sea, South Vietnam. Subtidal (4-43m.)                                                                                                          | Known only from the type locality                                                                                                                                                                                                                                                         | Fine sand, sand with black detritus, sandy mud, sandy mud with shell debris, calcareous sand or mud | Gallardo (1968) [50]; Sun & Li (2018) [98]              |
| <i>Orbinia wui</i>            | Sun & Li, 2018 [98]       | East China Sea and South China Sea, subtidal (58-84m.)                                                                                                         | Known only from the type locality                                                                                                                                                                                                                                                         | Sandy mud                                                                                           | Sun & Li (2018) [98]                                    |
| <i>Naineris quadricuspida</i> | Fabricius, 1780 [111]     | Paamiut/Frederikshaab region, Western Greenland, Labrador Sea. Under stones near the littoral                                                                  | Arctic Ocean, White Sea, Greenland; Norwegian Sea; Iceland; North Atlantic, from Irish Sea and North Sea to Skagerrak, and from Gulf of St Lawrence to Massachusetts; North Pacific, Japan, Alaska, British Columbia and California; Mediterranean Sea, Adriatic Sea. Intertidal to 2000m | Mud among the holdfasts of laminarians ( <i>Lithothamnium</i> ) or under stones                     | Hobson (1974) [112]; Kirkegaard (1996) [97]; WoRMS [16] |
| <i>Naineris antarctica</i>    | Blake, 2017 [6]           | Weddell Sea; Ross Sea: East of Cape Adare, N of Ross Island, off Cape Hallett. Antarctica, 344-923m                                                            | Known only from the type locality                                                                                                                                                                                                                                                         |                                                                                                     | Blake (2017) [6]                                        |
| <i>Naineris argentinensis</i> | Blake, 2017 [6]           | Rocas Pya Chica, Mar del Plata, Argentina, South-West Atlantic. Intertidal                                                                                     | Known only from the type locality                                                                                                                                                                                                                                                         |                                                                                                     | Blake (2017) [6]                                        |
| <i>Naineris aurantiaca</i>    | (Müller, 1858) [113]      | Pântano do Sul Beach, Santa Catarina Island, Florianópolis, Brazil, intertidal under rocks between oyster banks. Desterro, Brazil, in the original description | Known only from the type locality                                                                                                                                                                                                                                                         | In deposited sediments among algae rhizoids and in between the                                      | Alvarez et al. (2019) [114]                             |

|                            |                              |                                                                                                               |                                                                                                                   |                                                                                            |                                                                                                      |
|----------------------------|------------------------------|---------------------------------------------------------------------------------------------------------------|-------------------------------------------------------------------------------------------------------------------|--------------------------------------------------------------------------------------------|------------------------------------------------------------------------------------------------------|
|                            |                              |                                                                                                               |                                                                                                                   | shells of mussel beds ( <i>Perna perna</i> ) and oyster banks                              |                                                                                                      |
| <i>Naineris australis</i>  | Hartman, 1957 [1]            | Port Noarlunga and Encounter Bay, vicinity of south Adelaine and Troubridge, Yorke Peninsula, South Australia | Type locality; Victoria, New South Wales; Western Australia; Queensland, North-West Australia                     |                                                                                            | Hartman (1957) [1]; WoRMS                                                                            |
| <i>Naineris bicornis</i>   | Hartman, 1951 [14]           | Alligator Harbour and off Englewood Bay, Western Florida, Gulf of Mexico. In sand from shallow water          | Gulf of Mexico. Subtidal (19-54m)                                                                                 | Sand                                                                                       | Hartman (1957) [1]                                                                                   |
| <i>Naineris chilensis</i>  | Hartmann-Schröder, 1965 [12] | Puerto Aguirre, Chile, South-East Pacific                                                                     | Ecuador to Chile, intertidal to 10m                                                                               |                                                                                            | Blake (2017) [6]                                                                                     |
| <i>Naineris dendritica</i> | (Kinberg, 1866) [31]         | Vancouver Island, British Columbia, North-East Pacific, USA. Intertidal                                       | North-East Pacific, from Southern Alaska to Southern California; Arctic Canada; Gulf of Mexico. Intertidal to 35m | Sand and mud supporting abundant plant growth ( <i>Phyllospadix</i> in central California) | Hartman (1957); Blake (1996) [30]; Fauchald et al. (2009) [72]; Carr et al. (2011) [115]; WoRMS [16] |
| <i>Naineris furcillata</i> | Blake, 2017 [6]              | Staten Island off Tierra del Fuego, Argentina, and Strait of Magellan, Chile. Subtidal (10-64m)               | Known only from the type locality                                                                                 |                                                                                            | Blake (2017) [6]                                                                                     |
| <i>Naineris grubei</i>     | (Gravier, 1908) [116]        | Paita, Peru, South-East Atlantic                                                                              | Ecuador, Peru, Chile, California, Gulf of California, Gulf of Mexico, Australia. Intertidal to 125m               | Fine sand and on corals (in Australia)                                                     | Blake (2017) [6]; Fauchald et al. (2009) [72]                                                        |
| <i>Naineris jacutica</i>   | Annenkova, 1931 [117]        | Liakhovski Islands, Laptev Sea, Siberia. Subtidal (24m)                                                       | Laptev, Okhotsk and Bering Seas. Intertidal to 24m                                                                | Sand among seagrasses or mollusc beds and in muds                                          | Hartman (1957) [1]; Ivanova et al. (2001) [118]; Kostina and Tsurpalo [119] (2016)                   |



|                               |                        |                                                                                                       |                                                                                                                                                                                                                     |                                                 |                                                                                 |
|-------------------------------|------------------------|-------------------------------------------------------------------------------------------------------|---------------------------------------------------------------------------------------------------------------------------------------------------------------------------------------------------------------------|-------------------------------------------------|---------------------------------------------------------------------------------|
| <i>Naineris japonica</i>      | Imajima, 2009 [120]    | Off Sanrika, Japan, North-West Pacific, 354-424m                                                      | Known only from the type locality                                                                                                                                                                                   |                                                 | Imajima (2009) [120]                                                            |
| <i>Naineris kalkudaensis</i>  | (De Silva, 1965) [121] | Kalkudah, Sri Lanka, Laccadive Sea; Teluk Aling, Penang, Malacca Strait, Malaysia                     | Known only from the type locality                                                                                                                                                                                   |                                                 | De Silva (1965) [121]                                                           |
| <i>Naineris laevigata</i>     | (Grube, 1855) [122]    | Nice, Mediterranean Sea                                                                               | Western Mediterranean Sea, Adriatic Sea, Aegean Sea; Black Sea; Antillean Islands; Gulf Of Mexico; Bermuda; Jamaica; Brazil; South Africa; Persian Gulf; Sri Lanka; Hawaiian Islands; California. Intertidal to 30m | Mud or sand under stones and among algae        | Hartman (1957) [1]; Pagliosa et al. (2014) [17]; Al-Kandari et al. (2019) [123] |
| <i>Naineris mutilata</i>      | Treadwell, 1931 [124]  | Montego Bay, Jamaica, West Indies, Caribbean Sea. Depth not specified                                 | Known only from the type locality                                                                                                                                                                                   |                                                 | Hartman (1957) [1]                                                              |
| <i>Naineris nannobranchia</i> | Chamberlin, 1919 [53]  | Mendocino, California. Depth not specified                                                            | Known only from the type locality                                                                                                                                                                                   |                                                 | Hartman (1957) [1]                                                              |
| <i>Naineris quadraticeps</i>  | Day, 1965 [125]        | Abiad Bay, Entedebir Island, Dahlak Archipelago, Eritrea, Southern Red Sea. In intertidal coral sands | Type locality; Cape Messa-Vuno, Santorin Island, Aegean Sea, in a meadow of <i>Halophila stipulacea</i> , at 36m                                                                                                    |                                                 | Harmelin (1969) [42]                                                            |
| <i>Naineris retusiceps</i>    | Chamberlin, 1919 [53]  | Mohican Reef, Rangiroa Island, Paumotu Islands. Depth not specified in the original description       | Known only from the type locality                                                                                                                                                                                   |                                                 | Chamberlin (1919) [53]                                                          |
| <i>Naineris setosa</i>        | (Verrill, 1900) [126]  | Flatts Inlet, Bermuda, North-West Atlantic. Intertidal, shell-sand, low tide                          | Atlantic Ocean, Bermuda; Florida; Mexico, Vera Cruz; Puerto Rico, Belize; eastern Pacific, Mexico, Acapulco, Costa Rica, Cocos Islands, Galápagos Islands; invasive in the Adriatic and Mediterranean Seas.         |                                                 | Blake & Giangrande (2011) [127]; Blake (2017) [6]                               |
| <i>Naineris uncinata</i>      | Hartman, 1957 [1]      | South Slough, Coos Bay, Oregon, in hard packed sand and eel grass                                     | Eastern Pacific: Alaska to southern California. Shallow subtidal to 795m.                                                                                                                                           | On the Cascadia Subduction Zone, off Oregon, in | Hartman (1957) [1]; Blake (2020) [13]                                           |

|                                |                         |                                                                                                            |                                                                                                                                                                              |                                                                                                     |                                                                         |
|--------------------------------|-------------------------|------------------------------------------------------------------------------------------------------------|------------------------------------------------------------------------------------------------------------------------------------------------------------------------------|-----------------------------------------------------------------------------------------------------|-------------------------------------------------------------------------|
| <i>Naineris victoriae</i>      | Day, 1977 [19]          | Wasternport Bay, Victoria, Australia. Subtidal (9-12m)                                                     | Known only from the type locality                                                                                                                                            | gas hydrate and seep sediments                                                                      | Day (1977) [19]                                                         |
| <i>Phylo felix</i>             | Kinberg, 1866 [31]      | Brazil, South-East Atlantic                                                                                | South America: Brazil, Uruguay, Argentina, Patagonia, Southern Chile, Straits of Magellan; Falkland Islands; Antarctic Peninsula and off Elephant Island. Intertidal to 430m | Sand, mud, muddy sand, gravel, fine sand mixed with clay, shell bottom with rocks, rocks with algae | Blake (2017) [6]; Lana et al. (2006) [32]; Pagliosa et al. (2012) [128] |
| <i>Phylo capensis</i>          | Day, 1961 [74]          | Saldanha Bay, South-East Atlantic, South Africa                                                            | South Africa coast, subtidal (40-100m.)                                                                                                                                      |                                                                                                     | Day (1961) [74]                                                         |
| <i>Phylo felix asiaticus</i>   | Wu, 1962 [78]           | Yellow Sea, Pacific Ocean                                                                                  | Known only from the type locality                                                                                                                                            |                                                                                                     | Wu (1962) [78]                                                          |
| <i>Phylo fimbriata</i>         | (Moore, 1903) [129]     | Suruga Bay (37-475m) and North of Japan (46-112m.), North-West Pacific, Japan                              | Known only from the type locality, subtidal to lower continental slope (37-475m.)                                                                                            |                                                                                                     | Moore (1903) [129]                                                      |
| <i>Phylo foetida</i>           | (Claparède, 1868) [130] | Gulf of Naples, Tyrrhenian Sea, Italy                                                                      | Mediterranean Sea, Adriatic and Aegean Seas; Bay of Biscay; English Channel; Madagascar and Mozambique. Shallow subtidal (1-6m.)                                             | Mud or sand                                                                                         | Fauvel (1927) [102]; López (2012) [83]; WoRMS [16]                      |
| <i>Phylo foetida ligustida</i> | (Orlandi, 1896) [131]   | Gulf of Genova, Mediterranean Sea                                                                          | Mediterranean Sea, between 15-30m                                                                                                                                            | Mud or sand                                                                                         | Fauvel (1924 and 1927) [102,132]                                        |
| <i>Phylo foetida imitans</i>   | (Eisig, 1914) [67]      | Donn Anna, Villa Rendel and Villa Capella, at the coast of Posillipo, Gulf of Naples, Italy. Subtidal (8m) | Known only from the type locality                                                                                                                                            | Sand                                                                                                | Fauvel (1924 and 1927) [102,132]                                        |
| <i>Phylo foetida typica</i>    | Eisig, 1914 [67]        | Gulf of Naples, Tyrrhenian Sea, Italy. Subtidal (1-6m)                                                     | Known only from the type locality                                                                                                                                            | Muddy sand or sand                                                                                  | Fauvel (1924) [132]                                                     |
| <i>Phylo foetida liberiana</i> | (Augener, 1918)         | Libia, Western Africa                                                                                      | Senegal, Libia and Congo                                                                                                                                                     |                                                                                                     | Fauvel (1924) [132]                                                     |

|                                 |                                     |                                                                                                                                                                                       |                                                                                                                                                                                                           |                                            |                                                                                                |
|---------------------------------|-------------------------------------|---------------------------------------------------------------------------------------------------------------------------------------------------------------------------------------|-----------------------------------------------------------------------------------------------------------------------------------------------------------------------------------------------------------|--------------------------------------------|------------------------------------------------------------------------------------------------|
| <i>Phylo foetida australis</i>  | (Fauvel, 1919) [55]                 | Reefs of Tulear, Madagascar, Mozambique Channel, West Indian Ocean                                                                                                                    | Madagascar and Mozambique                                                                                                                                                                                 |                                            | Day (1967)                                                                                     |
| <i>Phylo foetida adjimensis</i> | (Fauvel, 1924) [132]                | Adjim, Mediterranean Sea, Tunisia. Intertidal                                                                                                                                         | Known only from the type locality                                                                                                                                                                         | Mud                                        | Fauvel (1924) [132]                                                                            |
| <i>Phylo foetida atlantica</i>  | (Fauvel, 1924) [132]                | Several localities around the French coast of the English Channel (Saint-Vaast, Cherbourg, Dinard, Terrénès) and around the Bay of Biscay (Noirmoutier, Ré, Yeu, Arcachon, Santander) | English Channel; Cantabric Sea; Western Mediterranean Sea. Intertidal, at low tide                                                                                                                        | Muddy sand                                 | Fauvel (1927) [102]                                                                            |
| <i>Phylo grubei</i>             | (McIntosh, 1910) [101]              | Off Ireland, North-East Atlantic, 772m.                                                                                                                                               | Off Brittany and off south Ireland; Norwegian Sea; Mediterranean Sea; Adriatic Sea; Aegean Sea; Cape Verde Archipelago. Subtidal and lower continental slope (150-772m.)                                  | Sandy mud and stones, with coral           | Fauvel (1927) [102]; Badalamenti and Castelli (1994) [133]; Kirkegaard (1996) [97]; WoRMS [16] |
| <i>Phylo kubbarensis</i>        | Mohammad, 1980 [134]                | Kubbar Island, Kuwait, Persian Gulf                                                                                                                                                   | Known only from the type locality, intertidal                                                                                                                                                             | Sand                                       | Mohammad (1980) [134]                                                                          |
| <i>Phylo kupfferi</i>           | (Ehlers, 1874) [135]                | West of the English Channel, North Atlantic, between 1325 and 2498m.                                                                                                                  | Arctic Ocean; North Atlantic to the Mediterranean Sea, Adriatic Sea, Aegean Sea; Northern North Sea, Skagerrak; Norwegian Sea; Falkland Islands; Persian Gulf. Subtidal to continental slope (140-2500m.) | Mud or Sandy mud                           | Badalamenti & Castelli (1994) [133]; Kirkegaard (1996) [97]; WoRMS [16]                        |
| <i>Phylo kuwaitica</i>          | Mohammad, 1970 [136]                | Kuwait Bay, Kuwait, Persian Gulf. Intertidal                                                                                                                                          | Known only from the type locality                                                                                                                                                                         | Sand                                       | Mohammad (1970) [136]                                                                          |
| <i>Phylo norvegicus</i>         | (M. Sars in G. O. Sars, 1872) [137] | Bollærene and Drøbak, North Sea, and Lofoten Archipelago, Norwegian Sea, Norway, between 90 and 220m.                                                                                 | Stated to be cosmopolitan. Baltic Sea; North Sea; Norwegian Sea; Barents Sea; Arctic Sea; North and South Atlantic; Mediterranean Sea, Adriatic and Aegean Sea. Between 20-2900m                          | Mud or mixed bottoms, seldom in pure sand. | G. O. Sars (1872) [137]; Kirkegaard (1996) [97]; Dauvin et al. (2003) [138];                   |

|                             |                                   |                                                                                                  |                                                                                                                    |                                                                                                                                      |                                                         |
|-----------------------------|-----------------------------------|--------------------------------------------------------------------------------------------------|--------------------------------------------------------------------------------------------------------------------|--------------------------------------------------------------------------------------------------------------------------------------|---------------------------------------------------------|
| <i>Phylo novazealandiae</i> | Day, 1977 [19]                    | Pelorus Sound, Tasman Bay and Pauatahanui, New Zealand. Subtidal (26m)                           | New Zealand, South-West Pacific Ocean                                                                              |                                                                                                                                      | Pagliosa et al. (2014) [17]<br>Day (1977) [19]          |
| <i>Phylo nudus</i>          | (Moore, 1911) [139]               | Gulf of the Farallones, Pioneer Canyon and Santa Maria Basin, Eastern North Pacific, California  | Eastern Pacific Ocean, California to Costa Rica, 760-3503m; Western Pacific Ocean, off Japan, 230-510m             | Mud                                                                                                                                  | Blake (1996) [30]; Blake (2020) [13]                    |
| <i>Phylo ornatus</i>        | (Verrill, 1873) [7]               | Savin Rock, Long Island Sound, New England, USA                                                  | East Coast USA, from New England to Florida; Gulf of Mexico; Southern California and Lower California. Intertidal. | Mud                                                                                                                                  | Verrill (1873) [7] and Hartman (1957) [1]               |
| <i>Orbiniella minuta</i>    | Day, 1954 [140]                   | Tristan da Cunha Island, South Atlantic. Intertidal to subtidal (40m)                            | Known only from the type locality                                                                                  |                                                                                                                                      | Parapar et al. (2015) [141]                             |
| <i>Orbiniella abyssalis</i> | Blake, 2020 [13]                  | Clairon-Clipperton Fracture Zone, North Equatorial Pacific Ocean, abyssal plain                  | Abyssal Pacific Ocean, 4844-4880m.                                                                                 |                                                                                                                                      | Blake (2020) [13]                                       |
| <i>Orbiniella aciculata</i> | Blake, 1985 [81]                  | Galapagos Rift, not associated with the vent community, continental slope (2.727-2730)           | Known only from the type locality                                                                                  |                                                                                                                                      | Blake (1985) [81]                                       |
| <i>Orbiniella andeepia</i>  | Narayanaswamy & Blake, 2005 [142] | South Shetland Islands, Northern Weddell Sea Basin and South Sandwich Slope, Antarctic Peninsula | Antarctic Ocean in slope and abyssal depths, 2257-5338m                                                            | Fine-medium silts in the Northern Weddell Sea and South Shetland Islands; coarse silts and medium sands on the South Sandwich Slope. | Narayanaswamy & Blake (2005) [142] and Blake (2017) [6] |
| <i>Orbiniella annulata</i>  | (Hartman, 1967) [4]               | Falkland Islands, Southwest Atlantic                                                             | Type locality, 646-845m; Off Tasmania, 86-101m                                                                     |                                                                                                                                      | Blake (2017) [6]                                        |
| <i>Orbiniella dayi</i>      | Branch, 1998 [143]                | Marion Island, Subantarctic. Intertidal to subtidal (15m)                                        | Known only from the type locality                                                                                  |                                                                                                                                      | Branch (1998) [143]                                     |

|                               |                                         |                                                                 |                                                                                 |                                                                                                            |                                                            |
|-------------------------------|-----------------------------------------|-----------------------------------------------------------------|---------------------------------------------------------------------------------|------------------------------------------------------------------------------------------------------------|------------------------------------------------------------|
| <i>Orbiniella eugeneruffi</i> | Blake, 2020 [13]                        | Off Brunei, Island of Borneo, South China Sea                   | Known only from the type locality, middle continental slope depths, 1199-1260m. |                                                                                                            | Blake (2020) [13]                                          |
| <i>Orbiniella grasslei</i>    | Blake, 2020 [13]                        | East Pacific Rise, hydrothermal vent area at 21°N               | known only from the type locality, 1618–2616 m.                                 |                                                                                                            | Blake (2020) [13]                                          |
| <i>Orbiniella hobsonae</i>    | Blake & Hilbig, 1990 [27]               | Juan de Fuca Ridge, NE Pacific, in hydrothermal vents (2.216m.) | Known only from the type locality                                               |                                                                                                            | Blake & Hilbig (1990) [27] and Parapar et al. (2015) [141] |
| <i>Orbiniella landrumae</i>   | Blake, 2017 [6]                         | Juan Fernandez Islands, Southeast Pacific, Chile                | Known only from the type locality, intertidal to subtidal (29m.)                |                                                                                                            | Blake (2017) [6]                                           |
| <i>Orbiniella longilobata</i> | Blake, 2020 [13]                        | Off Brunei, Island of Borneo, South China Sea                   | Known only from the type locality, 1199-2008m.                                  |                                                                                                            | Blake (2020) [13]                                          |
| <i>Orbiniella marionensis</i> | Gillet, 1999 [144]                      | Marion Island, Subantarctic. Subtidal (95-210m.)                | Known only from the type locality                                               | Sand, clay-sand or mud. Mixed sediment of gravel, broken shell and silt/sand.                              | Gillet (1999) [144]                                        |
| <i>Orbiniella nuda</i>        | Hobson, 1974 [112]                      | Washington, Northeast Pacific. Intertidal                       | Known only from the type locality                                               |                                                                                                            | Hobson (1974) [112]                                        |
| <i>Orbiniella petersenae</i>  | Parapar, Moreira & Helgason, 2015 [141] | SW Iceland, North Atlantic; NE Iceland, Norwegian Sea           | Off Iceland, from shelf (133m) to slope (1915m)                                 |                                                                                                            | Parapar et al. (2015) [141]                                |
| <i>Orbiniella plumisetosa</i> | Buzhinskaya, 1993 [145]                 | Bering and Kuril Island, North-west Pacific. Intertidal         | Known only from the type locality                                               | In rhizoids of <i>Corallina</i> , <i>Lithothamnion</i> and other small algae covering rocky littoral pools | Buzhinskaya (1993) [145] and Parapar et al. (2015) [141]   |
| <i>Orbiniella rugosa</i>      | Blake, 2020 [13]                        | Off Brunei, Island of Borneo, South China Sea                   | Known only from the type locality, 1199-2178m.                                  |                                                                                                            | Blake (2020) [13]                                          |
| <i>Orbiniella spinosa</i>     | Blake, 2017 [6]                         | Off Argentina, SW Atlantic                                      | Known only from the type locality, intertidal                                   | Among kelp holdfasts                                                                                       | Blake (2017) [6]                                           |

|                             |                                  |                                                                                                                                                                                                                                           |                                                                                                                                                                                                                                              |                                                                                                 |                                                                               |
|-----------------------------|----------------------------------|-------------------------------------------------------------------------------------------------------------------------------------------------------------------------------------------------------------------------------------------|----------------------------------------------------------------------------------------------------------------------------------------------------------------------------------------------------------------------------------------------|-------------------------------------------------------------------------------------------------|-------------------------------------------------------------------------------|
| <i>Orbiniella tumida</i>    | Blake, 2020 [13]                 | West of Farallon Islands, off northern California                                                                                                                                                                                         | Off northern California, lower continental slope and abyssal plain, 1730-4119m.                                                                                                                                                              | ( <i>Macrocystis</i> sp.)                                                                       | Blake (2020) [13]                                                             |
| <i>Orbiniella uniformis</i> | Hartman, 1967 [4]                | Arthur Harbor, Anvers Island, Antarctic Peninsula                                                                                                                                                                                         | Antarctic peninsula, low water (7m.)                                                                                                                                                                                                         |                                                                                                 | Blake (2017) [6]                                                              |
| <i>Questa caudicirra</i>    | Hartman, 1966 [57]               | Santa Catalina Island, Southern California, North-East Pacific, USA                                                                                                                                                                       | West coast of North America (California and British Columbia); Florida, Gulf of Mexico; Brazil, South-West Atlantic, 7-124m. The records from the Mediterranean Sea and the Canary Islands refer to different species (Giere & Erséus, 1998) |                                                                                                 | Hartman (1966) [57]; Giere & Erséus (1998) [146]; Pagliosa et al. (2014) [17] |
| <i>Questa bicirrata</i>     | Giere & Erséus, 1998 [146]       | Island of Mactan, Phillipines, intertidal to shallow subtidal between beach and coral reef; upper 3 µm of coralline fine sand, partly between seagrass ( <i>Thalassia</i> ) and foliose algae ( <i>Padina</i> ); sediment hand collecting | Known only from the type locality                                                                                                                                                                                                            | Intertidal to shallow subtidal, in coralline fine sand                                          | Giere & Erséus (1998) [146]; Salazar-Vallejo et al. (2014) [147]              |
| <i>Questa ersei</i>         | Jamieson & Webb, 1984 [148]      | Back reef of southern part of Carter Reef (on Outer Barrier NE of Lizard Island), Great Barrier Reef, Queensland, Australia                                                                                                               | Type locality; Houtman Abrolhos Islands, Western Australia, and Lord Howe Island, New Caledonia                                                                                                                                              | Intertidal to subtidal (31m), in fine to coarse sandy sediments, sometimes organically enriched | Jamieson & Webb (1984) [148]                                                  |
| <i>Questa fijiensis</i>     | Giere, Ebbe & Erséus, 2008 [149] | West Island, West of Lautoka, Viti Levu, Fiji Islands, East Indic, 0,5m, sand                                                                                                                                                             | Known only from the type locality                                                                                                                                                                                                            | Barely subtidal (0,5m), in fine to medium coralline sand with scattered sea grass.              | Giere, Ebbe & Erséus (2008) [149]                                             |

|                                     |                                  |                                                                                                                                                                                        |                                                                                                                                                   |                                                                                         |                                                             |
|-------------------------------------|----------------------------------|----------------------------------------------------------------------------------------------------------------------------------------------------------------------------------------|---------------------------------------------------------------------------------------------------------------------------------------------------|-----------------------------------------------------------------------------------------|-------------------------------------------------------------|
| <i>Questa media</i>                 | Westheide, 1981 [150]            | Santa Cruz Island, Galápagos Islands, Pacific Ocean, shallow subtidal                                                                                                                  | Known only from the type locality                                                                                                                 | Coarse shelly sand                                                                      | Westheide (1981) [150]                                      |
| <i>Questa mediterranea</i>          | Giere & Erséus, 1998 [146]       | Isola di Ponza, Cala Feola, Tyrrhenian Sea, West coast of Italy, 20m, seagrass ( <i>Posidonia oceanica</i> ) bed, fine sand rich in debris                                             | Known only from the type locality                                                                                                                 | Fine sand at 20m                                                                        | Giere & Erséus (1998) [146]                                 |
| <i>Questa paucibranchiata</i>       | Giere & Erséus, 1998 [146]       | Carrie Bow Cay, Belize, barrier reef off Belize, Central America, shallow subtidal between beach and coral reef, coralline fine sand, rich in organic debris; sediment hand collecting | Known only from the type locality                                                                                                                 | Shallow subtidal coralline fine sand                                                    | Giere & Erséus (1998) [146]                                 |
| <i>Questa retrospermatoca</i>       | Giere, Ebbe & Erséus, 2008 [149] | O'ahu, Hawai'i, NE Pacific, USA, 5-70m                                                                                                                                                 | Type locality and Ximaozhou (0,3m, coarse sand), West Coral Islet, and Wuzhi Island (intertidal, rocky sand) from southern coast of Hainan, China | Subtidal sediments (0-70m), mostly calcareous medium sand                               | Giere, Ebbe & Erséus (2008) [149]                           |
| <i>Questa riseri</i>                | Giere & Erséus, 1998 [146]       | North Rock, Bermuda Island, North-West Atlantic, sublitoral coralline sand, 6-7m                                                                                                       | Several localities around Bermuda Islands, subtidal in coralline sands (6-10m)                                                                    | Coralline sand                                                                          | Giere & Erséus (1998) [146]                                 |
| <i>Questa trifurcata</i>            | (Hobson, 1970) [151]             | Cape Cod Bay, Massachusetts, USA, 7-18m                                                                                                                                                | East coast of North America (Maine, Massachusetts, New Jersey) and Gulf of Mexico. From low intertidal to 200m                                    | Sand                                                                                    | Hobson (1970); Giere & Erséus (1998) [151]                  |
| <i>Protoariciella uncinata</i>      | Hartmann-Schröder, 1962 [152]    | Sea beach at about Km 235 of the Carretera Panamericana from Lima to the north, Peru, Pacific Ocean                                                                                    | Type locality and Argentina, South-West Atlantic                                                                                                  | Amongst intertidal brown algae below the balanid zone                                   | Hartmann-Schröder (1962) [152]; Pagliosa et al. (2014) [17] |
| <i>Protoariciella australiensis</i> | Hartmann-Schröder, 1981 [47]     | Drummond Cove, Geraldton, Western Australia, Indian Ocean. From intertidal to shallow subtidal                                                                                         | Known only from the type locality                                                                                                                 | Amongst rhizoids and thalli of tuft-like brown algae, and in fine sand between rhizoids | Hartmann-Schröder (1981) [47]                               |

|                                     |                               |                                                                                                                                                                                                                                                                                |                                                                                                                |                                                                       |                                  |
|-------------------------------------|-------------------------------|--------------------------------------------------------------------------------------------------------------------------------------------------------------------------------------------------------------------------------------------------------------------------------|----------------------------------------------------------------------------------------------------------------|-----------------------------------------------------------------------|----------------------------------|
| <i>Protoariciella heterosetosa</i>  | Hartmann-Schröder, 1962 [152] | 4km north of Taltal, Chile, South-East Pacific. Intertidal                                                                                                                                                                                                                     | Known only from the type locality                                                                              | and leaves of seagrasses<br>Among rhizoids of <i>Macrocystis</i> spp. | Hartmann-Schröder (1962) [152]   |
| <i>Protoariciella oligobranchia</i> | Hobson, 1976 [153]            | Maynard Cove, Victoria, British Columbia, North-East Pacific. Intertidal to 82m.                                                                                                                                                                                               | Type locality and off the eastern tip of Anacapa Island, Santa Barbara Channel, Southern California, USA, 82m. | Shell gravel, coarse sand or fine shell hash                          | Hobson (1976) [153]; This review |
| <i>Protoariciella parauncinata</i>  | Hartmann-Schröder, 1965 [12]  | Purto Aguirre, Islas Huichas, Chile, South-East Pacific. Intertidal                                                                                                                                                                                                            | Known only from the type locality                                                                              | Sand and gravel. Some records from the algae zone and rock pools      | Hartmann-Schröder (1965) [12]    |
| <i>Protoariciella subuluncinata</i> | Hartmann-Schröder, 1974 [154] | Vineta, near Swakopmund, Namibia, Western Africa, South-East Atlantic. Intertidal to shallow subtidal                                                                                                                                                                          | Known only from the type locality                                                                              | Amongst algae and sabellarids                                         | Hartmann-Schröder (1974) [154]   |
| <i>Protoariciella tuamotuensis</i>  | Hartmann-Schröder, 1992 [155] | Lagoon side of Rangiroa Atoll, near Kia Ora village, Tuamotu Islands, South-West Pacific. Subtidal phytal zone                                                                                                                                                                 | Known only from the type locality                                                                              | Subtidal calcareous algae from brain coral, in atoll lagoon           | Hartmann-Schröder (1992) [155]   |
| <i>Berkeleyia profunda</i>          | Hartman, 1971 [156]           | Mozambique Basin, Indian Ocean, 4886-5089m                                                                                                                                                                                                                                     | Known only from the type locality                                                                              | Abyssal plain, red-brown mud                                          | Hartman (1971) [156]             |
| <i>Berkeleyia abyssala</i>          | Blake, 2017 [6]               | Drake Passage, 3911-4176m; Weddell Sea, 3111-3514m; Off South Orkney Islands, Powell Basin, 1942-3406m.                                                                                                                                                                        | Known only from the type locality                                                                              |                                                                       | Blake (2017) [6]                 |
| <i>Berkeleyia hadala</i>            | Blake, 2017 [6]               | Off Western South America, from Ecuador to Chile: Off Ecuador, 2681-2864m; W of Isla Lobos de Tierra, Off Piura Province, Peru, 4591m; W of Trujillo, off Libertad Province, Peru, 3086-6143m; W of Isla Mocha, off Chile, 3739-4323m; W of Bahia Mansa, off Chile, 3089-3279m | Known only from the type locality                                                                              |                                                                       | Blake (2017) [6]                 |



|                              |                         |                                                                                                                                                                                                                                                                                                                                                                |                                                                                                                                 |                                                       |                                                          |
|------------------------------|-------------------------|----------------------------------------------------------------------------------------------------------------------------------------------------------------------------------------------------------------------------------------------------------------------------------------------------------------------------------------------------------------|---------------------------------------------------------------------------------------------------------------------------------|-------------------------------------------------------|----------------------------------------------------------|
| <i>Berkeleyia heroae</i>     | Blake, 2017 [6]         | Staten Island, off Tierra del Fuego, Argentina, intertidal to 1m.                                                                                                                                                                                                                                                                                              | Known only from the type locality                                                                                               | Hydrothermal vents                                    | Blake (2017) [6]                                         |
| <i>Berkeleyia lelievrei</i>  | Blake, 2020 [13]        | Endeavour segment, off Washington, Juan de Fuca Ridge, NE Pacific Ocean. Lower continental slope (2196m)                                                                                                                                                                                                                                                       | Known only from the type locality                                                                                               |                                                       | Blake (2020) [13]                                        |
| <i>Berkeleyia weddellia</i>  | Blake, 2017 [6]         | Weddell Sea, Antarctica, 2164m                                                                                                                                                                                                                                                                                                                                 | Known only from the type locality                                                                                               |                                                       | Blake (2017) [6]                                         |
| <i>Califia calida</i>        | Hartman, 1957 [1]       | San Pedro Basin, California, North-East Pacific, 470-764m.                                                                                                                                                                                                                                                                                                     | Type locality; Off Oregon to Mexico, 946-2730m.; Japan, North-West Pacific, 180-740m.; Off Brunei, South China Sea, 1127-1487m. | Chile, in fine to coarse sand; Uruguay, in muddy sand | Hartman (1957) [1]; Blake (1996) [30]; Blake (2020) [13] |
| <i>Califia bilamellata</i>   | Blake, 2017 [6]         | The Bay of Puerto Monntt, Seno Reloneavi, 13-16m., and SW of Isla Tabon, Golfo de Ancud, 200m., Southern Chile; Off Uruguay, 115-117m.                                                                                                                                                                                                                         | Known only from the type locality                                                                                               |                                                       | Blake (2017) [6]                                         |
| <i>Califia chilensis</i>     | Hartman, 1967 [4]       | Off Chiloe Island, Western Chile, 3651-3655m.                                                                                                                                                                                                                                                                                                                  | Known only from the type locality                                                                                               |                                                       | Hartman (1967) [4]; Blake (2017) [6]                     |
| <i>Califia mexicana</i>      | Fauchald, 1972 [23]     | Different localities from off Baja California: Creston Island light, Mazatlan, 2515m.; Isla San José light, 2432m.; Punta Colorado, Isla San José, 2447m.; Punta Abreojos, 2030m., in grey mud, 2515m., Punta San Telmo light, 2295m. Also in Cabo Corrientes and in the southern part of the Gulf of California, Western Mexico. In slope and abyssal depths. | Known only from the type locality                                                                                               |                                                       | Fauchald (1972) [23]                                     |
| <i>Califia schmitti</i>      | (Pettibone, 1957) [29]  | Off Massachusetts to off New York, USA, North-West Atlantic, 1441-1940m.                                                                                                                                                                                                                                                                                       | Known only from the type locality                                                                                               |                                                       | Pettibone (1957) [29]                                    |
| <i>Protoaricia oerstedii</i> | (Claparède, 1864) [157] | Port-Vendres, Mediterranean Sea, France                                                                                                                                                                                                                                                                                                                        | Gulf of Mexico; Nort-East Atlantic (Azores Archipelago; Madeira; Canary Island; Coast of Europe); Mediterranean Sea,            | On rocks, among algae, ascideans or mussels           | Fauvel (1927) [102]; Badalmenti and Castelli (1994)      |

|                                                                                                  |                                                                                  |                                                                                                                                                                                                                                                                                  |                                                                                                                                                           |                                                                                                                                   |                                                                                                                                   |
|--------------------------------------------------------------------------------------------------|----------------------------------------------------------------------------------|----------------------------------------------------------------------------------------------------------------------------------------------------------------------------------------------------------------------------------------------------------------------------------|-----------------------------------------------------------------------------------------------------------------------------------------------------------|-----------------------------------------------------------------------------------------------------------------------------------|-----------------------------------------------------------------------------------------------------------------------------------|
| <i>Protoaricia capsulifera</i><br><i>Protoaricia pigmentata</i>                                  | (Bobretzky, 1870) [158]<br>Solis-Weiss & Fauchald, 1989 [159]                    | Black Sea<br><br>Blue Ground Range, west side of middle island, Stan Creek, Belize Caribbean Sea. Low Intertidal (10-50 cm depth), among root-mat of <i>Rhizophora mangle</i> , covered with <i>Caulerpa verticillata</i>                                                        | Adriatic Sea, Aegean Sea; Black Sea. Intertidal to shallow subtidal<br><br>Known only from the type locality<br>Caribbean Sea                             | In the root-mat of a red mangrove forest <i>Rhizophora mangle</i> , covered with <i>Caulerpa verticillata</i> , 10-50 cm depth.   | [133]; Lopez (2012) [83]; WoRMS [16]<br>Bobretzky (1870) [158]<br>Solis-Weiss & Fauchald (1989) [159];<br>Miloslavich (2010) [15] |
| <i>Schroederella pauliani</i><br><i>Schroederella berkeleyi</i><br><i>Schroederella laubieri</i> | Laubier, 1962 [160]<br>Laubier, 1971 [161]<br>Badalamenti & Castelli, 1991 [162] | Sandwich Bay, South of Walvis Bay, Namibia. Intertidal<br>Craigville Beach, Centerville, Barnstable County, Massachusetts. Intertidal<br>Bay of Carini, North-West coast of Sicily, Mediterranean Sea. Subtidal (18m) in a SFBC biocenosis with a <i>Cymodocea nosoda</i> meadow | Known only from the type locality<br>Known only from the type locality<br>Type locality and Island of Elba, Ligurian Sea, Mediterranean. Subtidal (9-18m) | Sand rich in organic particles<br>Coarse sand or <i>Cymodocea nodosa</i> meadow                                                   | Laubier (1962) [160]<br>Laubier (1971) [161]<br>Badalamenti & Castelli (1991 and 1994) [133,162]                                  |
| <i>Pettibonella multiuncinata</i>                                                                | Solis-Weiss and Fauchald, 1989 [159]                                             | West Bay, Twin Cays, Caribbean Sea, Belize, 10-50cm                                                                                                                                                                                                                              | Known only from the type locality                                                                                                                         | In the root-mat of a red mangrove forest <i>Rhizophora mangle</i> , covered with <i>Caulerpa verticillata</i> .<br>Coralline sand | Solis-Weiss and Fauchald (1989) [159]                                                                                             |
| <i>Pettibonella shompens</i>                                                                     | Gopal, Useph, Varghese & Narayana, 2014 [163]                                    | Car Nicobar Island, Andaman and Nicobar Islands, Bay of Bengal, Indian Ocean, 49-50m                                                                                                                                                                                             | Known only from the the type locality                                                                                                                     |                                                                                                                                   | Gopal, Useph, Varghese & Narayana (2014) [163]                                                                                    |

|                                       |                                    |                                                                                                                      |                                                                                                                                                                                                                      |                                                                                                                 |                                                                                |
|---------------------------------------|------------------------------------|----------------------------------------------------------------------------------------------------------------------|----------------------------------------------------------------------------------------------------------------------------------------------------------------------------------------------------------------------|-----------------------------------------------------------------------------------------------------------------|--------------------------------------------------------------------------------|
| <i>Methanoaricia dendrobranchiata</i> | Blake, 2000 [164]                  | Green Canyon, continental slope of Louisiana, Gulf of Mexico, 650m, in mussel beds adjacent to Brine Pool.           | Known only from the type locality                                                                                                                                                                                    | Associated with cold-seep mussel beds in the Louisiana continental slope, Gulf of Mexico                        | Blake (2000) [164]; Van Gaest et al. (2007) [165]; Fauchald et al. (2009) [72] |
| <i>Microrbinia linea</i>              | Hartman, 1965 [84]                 | Off New England, North-West Atlantic, 824m                                                                           | Type locality; Off the mouth of the Amazon River, Atlantic, in 770 to 1500m                                                                                                                                          |                                                                                                                 | Hartman (1965) [84]                                                            |
| <i>Paraorbiniella paucibranchiata</i> | Rullier, 1974 [166]                | Baie de Batabano, Caribbean Sea, Cuba, 4m                                                                            | Known only from the type locality                                                                                                                                                                                    |                                                                                                                 | Rullier (1974) [166]                                                           |
| <i>Pararicia belizensis</i>           | Solis-Weiss & Fauchald, 1989 [159] | West Bay, Twin Cays, Caribbean Sea, Belize, 10-50cm                                                                  | Known only from the type locality                                                                                                                                                                                    | In the root-mat of a red mangrove forest <i>Rhizophora mangle</i> , covered with <i>Caulerpa verticillata</i> . | Solis-Weiss & Fauchald (1989) [159]                                            |
| <i>Proscoloplos cygnochaetus</i>      | Day, 1954 [167]                    | Tristan da Cunha Island, Tristan da Cunha, South Atlantic. Intertidal, in small enclosed rock pool in the spray zone | Type locality; Chilean part of the South Pacific; Cape Town, South Africa; Roscoff, France, English Channel; Concarneau, Bay of Biscay, France; Bondi Beach and Edithburg, Australia; Twin Cayes, Belize. Intertidal |                                                                                                                 | Day (1954) [167]; Meyer et al. (2008) [168]                                    |
| <i>Uncorbinia brevibranchiata</i>     | Hartmann-Schröder, 1979 [169]      | Mangrove at Pretty Pool Estuary, Port Hedland, North-West Australia, Indic Ocean                                     | Known only from the type locality                                                                                                                                                                                    | Silt with firm clay and sand, in mangrove                                                                       | Hartmann-Schröder (1979) [169]                                                 |

**Table S2. Summary table.** All the information contained in the species table summarized by the number of valid species per each genus, the depth and the habitat where each genus is predominant and the total number of orbiniid species.

| Genus          | Species | Predominance                                                                               |
|----------------|---------|--------------------------------------------------------------------------------------------|
| Scoloplos      | 29      | Intertidal to about 100m, can be abundant. In mud or muddy sand                            |
| Leitoscoloplos | 35      | Intertidal to about 300m, can be abundant. In mud or muddy sand                            |
| Leodamas       | 32      | Intertidal to about 300m. In mud or muddy sand                                             |
| Naineris       | 21      | Intertidal to shallow subtidal (50m). In mud or sand among algal holdfasts                 |
| Orbinia        | 24      | Intertidal to 100m. In sand                                                                |
| Phylo          | 20      | Shallow subtidal to lower continental slope (5-500m), can be abundant. In mud or sand      |
| Orbiniella     | 19      | Between middle and deep continental slope (1000-3000m). Poor knowledge on the habitat type |
| Questa         | 10      | Shallow subtidal (1-50m). In fine sand or coralline fine sand                              |
| Protoariciella | 7       | Intertidal to shallow subtidal (50m). In sand or gravel among algal holdfasts              |
| Berkeleyia     | 6       | Deep slope and abyssal depths (2000-5000m). Poor knowledge on the habitat type             |
| Califia        | 5       | Slope and abyssal depths (500-4000m). Poor knowledge on the habitat type                   |
| Protoaricia    | 3       | Intertidal to shallow subtidal (1m). In sandy sediment among algal holdfasts               |
| Schroederella  | 3       | Intertidal to subtidal (18m). In sand or in <i>Cymodocea nodosa</i> meadow                 |
| Pettibonella   | 2       | Shallow subtidal (0,10-50m). In sandy sediment among algal holdfasts                       |
| Methanoaricia  | 1       | Continental slope (650m). Associated with cold-seep mussel beds in the Gulf of Mexico      |
| Microrbinia    | 1       | Continental slope (824m). Habitat type not specified in the unique reported species        |
| Paraorbiniella | 1       | Shallow subtidal (4m). Habitat type not specified in the unique reported species           |
| Pararicia      | 1       | Shallow subtidal (10-50cm). Among algal holdfasts                                          |
| Proscoloplos   | 1       | Intertidal. Habitat type not specified in the unique reported species                      |
| Uncorbinia     | 1       | Mangrove, in sand or silt with firm clay                                                   |
| TOTAL          | 222     |                                                                                            |

## References

1. Hartman, O. Orbiniidae, Apistobranchidae, Paraonidae and Longosomidae. *Allan Hancock Pacific Expeditions* **1957**, 15, 211-393.
2. Hutchings, P.; Rainer, S. The polychaete fauna of Careel Bay, Pittwater, New South Wales, Australia. *Journal of Natural History* **1979**, 13, 745-796.
3. Zhadan, A.; Stupnikova, A.; Neretina, T. Orbiniidae (Annelida: Errantia) from Lizard Island, Great Barrier Reef, Australia with notes on orbiniid phylogeny. *Zootaxa* **2015**, 4019, 773-801, doi:10.11646/zootaxa.4019.1.27.
4. Hartman, O. Polychaetous annelids collected by the USNS Eltanin and Staten Island cruises, chiefly from Antarctic Seas. *Allan Hancock Monographs in Marine Biology* **1967**, 2, 1-387.
5. Mackie, A.S. A review of species currently assigned to the genus *Leitoscoloplos* Day, 1977 (Polychaeta: Orbiniidae), with descriptions of species newly referred to *Scoloplos* Blainville, 1828. *Sarsia* **1987**, 72, 1-28.
6. Blake, J.A. Polychaeta Orbiniidae from Antarctica, the Southern Ocean, the Abyssal Pacific Ocean, and off South America. *Zootaxa* **2017**, 4218, 1-145, doi:10.11646/zootaxa.4218.1.1.
7. Verrill, A.E. XVIII. Report upon the invertebrate animals of Vineyard Sound and the adjacent waters, with an account of the physical characters of the region. *Report on the condition of the sea fisheries of the south coast of New England [later becomes Reports of the United States Commissioner of Fisheries]* **1873**, 1, 295-778.
8. Hartman, O. The marine annelids erected by Kinberg with notes on other types in the Swedish State Museum. *Archiv. F. Zool. A* **1948**, 42.
9. Pettibone, M.H. Marine polychaete worms of the New England region. I. Aphroditidae through Trochochaetidae. *Bulletin of the United States National Museum* **1963**.
10. Zhadan, A. Taxonomy of the genus *Scoloplos* (orbiniidae) in the white, barents and north seas. *Зоологический журнал* **1998**, 77.
11. de Leon-Gonzalez, J.A.; Rodriguez, J.A. Orbiniidae (Polychaeta) from soft bottom of the western coast of Baja California Peninsula, Mexico. *Bulletin of Marine Science* **1996**, 59, 169-174.
12. Hartmann-Schröder, G. Die Polychaeten des Sublitorals. zur Kenntnis des Sublitorals der chilenischen Küste unter besonderer Berücksichtigung der Polychaeten und Ostracoden (Mit Bemerkungen über den Einfluss sauerstoffarmer strömungen auf die Besiedlung von marinen Sedimenten). *Mitteilungen aus dem Hamburgischen Zoologischen Museum und Institut* **1965**, 62, 59-305.
13. Blake, J.A. New species and records of deep-water Orbiniidae (Annelida, Polychaeta) from the Eastern Pacific continental slope, abyssal Pacific Ocean, and the South China Sea. *Zootaxa* **2020**, 4730, zootaxa 4730 4731 4731, doi:10.11646/zootaxa.4730.1.1.
14. Hartman, O. The littoral marine annelids of the Gulf of Mexico. *Publications of the Institute of Marine Science, Port Aransas, Texas* **1951**, 2, 7-124.
15. Miloslavich, P.; Díaz, J.M.; Klein, E.; Alvarado, J.J.; Díaz, C.; Gobin, J.; Escobar-Briones, E.; Cruz-Motta, J.J.; Weil, E.; Cortes, J. Marine biodiversity in the Caribbean: regional estimates and distribution patterns. *PloS one* **2010**, 5, e11916, doi:<https://doi.org/10.1371/journal.pone.0011916>.
16. WoRMS. World Register of Marine Species. Available from: <http://marinespecies.org> (accessed 20 October 2020) **2020**.
17. Pagliosa, P.R.; Doria, J.G.; Misturini, D.; Otegui, M.B.; Oortman, M.S.; Weis, W.A.; Faroni-Perez, L.; Alves, A.P.; Camargo, M.G.; Amaral, A.C.Z. NONATObase: a database for Polychaeta (Annelida) from the Southwestern Atlantic Ocean. *Database* **2014**, 2014, doi:<https://doi.org/10.1093/database/bau002>.

18. McIntosh, W.C. Report on the Annelida Polychaeta collected by HMS" Challenger" during the years 1873-76. *Reports on the Scientific Results of the Voyage of HMS" Challenger"*. *Zoology* **1885**, 12, 1-554.
19. Day, J. A review of the Australian and New Zealand Orbiniidae (Annelida: Polychaeta). In *Essays on Polychaetous Annelids in Memory of Dr. Olga Hartman*, Reish, D.J., Fauchald, K., Ed. Allan Hancock Foundation, Los Angeles, 1977; pp. 217-243.
20. Eibye-Jacobsen, D. The Orbiniidae (Annelida: Polychaeta) of the BIOSHELF Project, Andaman Sea, Thailand. *Phuket Marine Biological Center, Special Publication* **2002**, 24, 77-99.
21. Benham, W.B. Polychaeta. Australasian Antarctic Expedition 1911–1914. Under the leadership of Sir Douglas Mawson. *Scientific Reports, Series C—Zoology and Botany* **1921**, 6, 1-128.
22. Cantone, G.; Di Pietro, N. Benthic littoral Polychaeta "Sedentaria" of Terra Nova Bay (Ross Sea, Antarctica). *Antarctic Science* **2001**, 13, 3.
23. Fauchald, K. Benthic polychaetous annelids from deep water off western Mexico and adjacent areas in the eastern Pacific Ocean. *Allan Hancock Monographs in Marine Biology* **1972**, 7, 162-171.
24. Hernández-Alcántara, P.; Solís-Weiss, V. Anatomical and morphometric analysis of a new species of *Leitoscoloplos* (Annelida: Orbiniidae) with numerous stomach papillae, from the Gulf of California, Eastern Pacific. *Contributions to Zoology* **2014**, 83, 133-150, doi:<https://doi.org/10.1163/18759866-08302004>.
25. Dean, H.K.; Blake, J.A. The Orbiniidae (Annelida: Polychaeta) of Pacific Costa Rica. *Zootaxa* **2015**, 3956, 183-198, doi:10.11646/zootaxa.3956.2.2.
26. Neal, L.; Paterson, G.L.; Blockley, D.; Scott, B.; Sherlock, E.; Huque, C.; Glover, A.G. Biodiversity data and new species descriptions of polychaetes from offshore waters of the Falkland Islands, an area undergoing hydrocarbon exploration. *ZooKeys* **2020**, 938, 1, doi:<http://zoobank.org/76B7FF03-FEB1-4884-AD29-55BE864F0EBF>.
27. Blake, J.A., Hilbig, B. Polychaeta from the vicinity of deep-sea hydrothermal vents in the Eastern Pacific Ocean. II. New species and records from the Juan de Fuca and Explorer Ridge systems. *Pacific Science* **1990**, 44, 219-253.
28. Monro, C.C.A. The Polychaeta Sedentaria collected by Dr. C. Crossland at Colón, in the Panama region, and the Galapagos Islands during the Expedition of the S.Y. 'St. George'. *Proceedings of the Zoological Society of London* **1933**, 103, 1039-1092.
29. Pettibone, M.H. North American genera of the family Orbiniidae (Annelida: Polychaeta), with descriptions of new species. *Journal of the Washington Academy of Sciences* **1957**, 47, 159-167.
30. Blake, J. Family Orbiniidae Hartman, 1942. In *Taxonomic atlas of the benthic fauna of Santa Maria Basin and western Santa Barbara Channel. The Annelida Part 3 - Polychaeta: Orbiniidae to Cossuridae*, 1996; Vol. 6, pp. 1-26.
31. Kinberg, J. Annulata nova. *Öfversigt af Kungliga Vetenskaps-Adakemiens Förhandlingar, Stockholm* **1866**, 22, 239-258.
32. Lana, P.; Santos, C.; Oliveira, V.; Garraffoni, A.; Radashevsky, V. Checklist of polychaete species from Paraná state (Southern Brazil). *Check List* **2006**, 2, 30.
33. Pagliosa, P.R.; Cantor, M.; Scherner, F.; Otegui, M.B.P.; Lemes-Silva, A.L.; Martins, C.D.L.; Alves, G.F.; Fonseca, A.; Horta Jr, P.A. Influence of piers on functional groups of benthic primary producers and consumers in the channel of a subtropical coastal lagoon. *Brazilian Journal of Oceanography* **2012**, 60, 65-73, doi:<https://doi.org/10.1590/S1679-87592012000100007>
34. Hartmann-Schröder, G. Zur Kenntnis des eulitorals der

- australischen Kuesten unter besonderer Beruecksichtigung des Polychaeten und Ostracoden. Teil 16. Die Polychaeten der subtropisch-tropischen bis tropischen Ostkueste Australiens zwischen Maclean (New South Wales) und Gladstone (Queensland) sowie von Heron Island (Grosses Barrier Riff). *Mitteilungen aus dem Hamburgischen Zoologischen Museum und Institut* **1991**, 88, 17-71.
35. Nonato, E.F.; Luna, J.A.C. Anelídeos poliquetas do nordeste do Brasil: I-poliquetas bentônicos da costa de Alagoas e Sergipe. *Boletim do Instituto Oceanográfico* **1970**, 19, 57-130.
  36. Fauvel, P. Annélides polychètes de la Casamance rapportées par M. Aug. Chevalier. *Bulletin de la Société Linnéenne de Normandie* **1902**, 5e Série, 59-105.
  37. Fauvel, P. Annélides polychètes non pélagiques. *Expédition Océanographique Belge dans les eaux côtières africaines de l'Atlantique Sud Institut Royale des Sciences Naturelles de Belgique* **1953**, 4, 13-17.
  38. GRAVIER, O. Contribution a l'étude des annélides polychètes de la Mer Rouge (suite). *Nouvelles Archives du Muséum d'Histoire Naturelle, Paris* **1906**, 4e Série, 123-236.
  39. Wesenberg-Lund, E. Polychaetes of the Iranian Gulf. *Danish Scientific Investigations in Iran, Part 4* **1949**, 247-400.
  40. Ehlers, E. Magellanische Anneliden gesammelt während der schwedischen Expedition nach den Magellansländer. *Nachrichten von der Gesellschaft der Wissenschaften zu Göttingen, Mathematisch-Physikalische Klasse* **1900**, 1900, 206-223.
  41. Ehlers, E. Die Polychaeten des magellanischen und chilenischen Strandes: Ein faunistischer Versuch. *Festschrift zur Feier des Hundertfünfzigjährigen Bestehens der königlichen Gesellschaft der Wissenschaften zu Göttingen* **1901**, 1-232.
  42. Harmelin, J.G. Contribution à l'étude de l'endofaune des prairies d'*Halophila stipulacea* de Méditerranée Orientale. *Recueil des Travaux de la Station Marine d'Endoume* **1969**, 45, fasc. 61, 305-316.
  43. Faulwetter, S.; Simboura, N.; Katsiaras, N.; Chatzigeorgiou, G.; Arvanitidis, C. Polychaetes of Greece: an updated and annotated checklist. *Biodiversity Data Journal* **2017**, doi: 10.3897/BDJ.5.e20997, doi:doi: 10.3897/BDJ.5.e20997.
  44. Ehlers, E. *Ergebnisse der Hamburger Magalhaensischen Sammelreise 1892/93*; Hamburg, Germany: L. Friederichsen & Co, 148, 1897.
  45. Ehlers, E. Neuseelandische Anneliden. *Abhandlung der Koeniglichen Gesellschaft der Wisseschaften zu Göttingen, Mathematisch-Physikalische Klasse* **1904**, Neue Folge 3, 1-80.
  46. Augener, H. Die Fauna Südwest-Australiens. Polychaeta Sedentaria. *Herausgegeben von Michaelsen und Hartmeyer* **1914**, Jena, 5, 1-170.
  47. Hartmann-Schröder, G. Zur Kenntnis des Eulitorals der australischen Kusten unter besonderer Berücksichtigung der Polychaeten und Ostracoden. Teil 6. Die Polychaeten der tropisch-subtropischen Westkuste Australiens (zwischen Exmouth im Norden und Cervantes im Süden). *Mitteilungen aus dem Hamburgischen zoologischen Museum und Institut* **1981**, 78, 48-49.
  48. Tebble, N. The polychaete fauna of the Gold Coast [=Ghana]. *Bulletin of the British Museum (Natural History), Ser. Zoology* **1955**, 3, 59-148.
  49. Pillai, T.G. Annelida Polychaeta of Tambalagam Lake, Ceylon. *Ceylon Journal of Science (Biological Sciences)* **1961**, 4, 1-40.
  50. Gallardo, V.A. Polychaeta from the bay of Nha Trang, South Viet Nam. *Scientific Researches on the Marine Invertebrates of South China Sea Gulf Thailand*, 1959–  
1961 *NAGA report* **1968**, 4, 91-96.
  51. Day, J.H. On a collection of South African Polychaeta, with a catalogue of the species recorded from South Africa, Angola, Mosambique, and Madagascar. *Zoological Journal of the Linnean Society* **1934**, 39, 15-82, doi: <http://dx.doi.org/10.1111/j.1096-3642.1934.tb00259.x>.

52. Day, J.H. A monograph on the Polychaeta of Southern Africa. Part 2. Sedentaria. In *Trustees of the British Museum (Natural History)*, British Museum of Natural History, London, 1967; pp. 459-878.
53. Chamberlin, R.V. New polychaetous annelids from Laguna Beach, California. *Pomona College Journal of Entomology and Zoology* **1919**, *11*, 1-23.
54. Fauvel, P. Annelida Polychaeta of the Indian Museum, Calcutta. *Memoirs of the Indian Museum* **1932**, *12*, 262 pp., 163-165.
55. Fauvel, P. Annélides Polychètes nouvelles de l'Afrique orientale: 2ième note. *Bulletin du Muséum d'histoire naturelle* **1919**, *1*, 33-39.
56. Day, J. The polychaete fauna of South Africa. Part I. The intertidal and estuarine Polychaeta of Natal and Mosambique. *Annals of the Natal Museum* **1951**, *12*, 1-67.
57. Hartman, O. Quantitative survey of the benthos of SanPedro Basin, Southern California. Part 11. Final results and conclusions. *Allan Hancock Pacific Expedition* **1966**, *19*, 187-456.
58. Knox, G.A.; Cameron, D. The marine fauna of the Ross Sea: Polychaeta. *NIWA Biodiversity Memoir* **1998**, No. 108, 1-125.
59. Fauchald, K. The polychaete worms. Definitions and keys to the orders, families and genera. *Natural History Museum of Los Angeles County, Science Series* **1977**.
60. López, E.; Cladera, P.; San Martín, G. Two new species of the genus *Leodamas* (Orbiniidae: Scolecida: Polychaeta) from the Pacific coast of Panama. *Marine Biological Association of the United Kingdom. Journal of the Marine Biological Association of the United Kingdom* **2003**, *83*, 367.
61. Webster, H.E. The Annelida Chaetopoda of the Virginian coast. *Transactions of the Albany Institute* **1879**, *9*, 202-269.
62. Taylor, J. Chapter 1, Family Orbiniidae Hartman, 1942. In: Uebelacker, J.M. & Johnson, P.G. (Eds.). *Taxonomic guide to the polychaetes of the Northern Gulf of Mexico* **1984**, *1*, 1-38.
63. Sun, Y.; Sui, J.; Li, X. A new species of *Leodamas* Kinberg, 1866 (Polychaeta: Orbiniidae) from the Yellow Sea and the East China Sea. *Acta Oceanologica Sinica* **2018**, *37*, 130-135, doi:<https://doi.org/10.1007/s13131-018-1313-2>.
64. Maciolek, N.J.; Holland, J. *Scoloplos texana*: a new orbiniid polychaete from south Texas, with notes on the related species *Scoloplos treadwelli* Eisig. *Contributions in Marine Science* **1978**, *21*, 163-169.
65. Granados-Barba, A.; Solís-Weiss, V. The polychaetous annelids from oil platforms areas in the southeastern Gulf of Mexico: Phyllodocidae, Glyceridae, Goniadidae, Hesionidae, and Pilargidae, with description of *Ophioglycera lyra*, a new species, and comments on *Goniada distorta* Moore and *Scoloplos texana* Maciolek & Holland. *Proceedings-Biological Society of Washington* **1997**, *110*, 457-470.
66. Amoureux, L. Annélides polychètes recueillies sur la pente continentale de la Bretagne a l'Irlande, campagne 1973 de la "Thalasse"(suite et fin) avec la description de quatre espèces nouvelles pour la science. II. Inventaire taxonomique annoté de toutes les polychètes sédentaires. *Cahiers de Biologie marine* **1982**, *23*, 179-214.
67. Eisig, H. Zur Systematik, Anatomie und Morphologie der ariciiden nebst beiträgen zur generellen Systematik. *Mitteilungen aus der zoologischen Station zu Neapel* **1914**, *21*, 153-500.
68. Treadwell, A.L. The polychaetous annelids of Porto Rico. *Bulletin of the United States Fisheries Commission, Washington* **1901**, *20*, 181-210.
69. Müller, O.F. Zoologiæ Danicæ Prodromus, seu Animalium Daniæ et Norvegiæ indigenarum characteres, nomina, et synonyma imprimis popularium. *Havniæ* **1776**, 1-282.
70. Holtmann, S.; Groenewold, A.; Schrader, K.; Asjes, J.; Craeymeersch, J.; Duineveld, G.; van Bostelen, A.; van der Meer, J. Atlas of the zoobenthos of the Dutch Continental Shelf. Ministry of Transport, Public Works and Water Management, North Sea Directorate, Rijswijk. **1996**, 244 pp.



71. Bleidorn, C.; Kruse, I.; Albrecht, S.; Bartolomaeus, T. Mitochondrial sequence data expose the putative cosmopolitan polychaete *Scoloplos armiger* (Annelida, Orbiniidae) as a species complex. *BMC Evol Biol* **2006**, *6*, 47, doi:10.1186/1471-2148-6-47.
72. Fauchald, K.; Granados-Barba, A.; Solís-Weiss, V. Polychaeta (Annelida) of the Gulf of Mexico. in D.L. Felder and D.K. Camp (Eds.). *Gulf of Mexico origin, waters, and biota* **2009**, *1*, 751-788, doi: <https://books.google.es/books?id=CphA8hiwaFIC&lpg=PR1&pg=PA751>.
73. Hartman, O. Systematic account of some marine invertebrate animals from the deep basins off southern California. *Allan Hancock Pacific Expeditions* **1960**, *22*, 69-216.
74. Day, J.H. The Polychaete Fauna of South Africa. Part 6. Sedentary species dredged off Cape coasts with a few new records from the shore. *The Polychaete Fauna of South Africa*. **1961**, *44*, 463-560 pp., 480.
75. Raman, A.; Ganapati, P. Occurrence of *Scolaricia capensis* Day, 1961 (Polychaeta: Orbiniidae) off the east coast of India, Bay of Bengal. *Indian Journal of Marine Sciences* **1977**, *6*, 185-186.
76. Wolff, W.; Duiven, A.; Duiven, P.; Esselink, P.; Gueye, A.; Meijboom, A.; Moerland, G.; Zegers, J. Biomass of macrobenthic tidal flat fauna of the Banc d'Arguin, Mauritania. *Hydrobiologia* **1993**, *258*, 151-163.
77. Pati, S.; Swain, D.; Sahu, K.; Sharma, R. Diversity and Distribution of Polychaetes (Annelida: Polychaeta) Along Maharashtra Coast, India. In *Aquatic Ecosystem: Biodiversity, Ecology and Conservation*, Springer: 2015; [https://doi.org/10.1007/978-81-322-2178-4\\_5pp](https://doi.org/10.1007/978-81-322-2178-4_5pp). 53-65.
78. Wu, B. New species of polychaete worms of the family Orbiniidae and Paraonidae from the Yellow Sea. *Acta Zoologica Sinica* **1962**, *14*, 421-426.
79. Hartmann-Schröder, G. des Eulitorals der australischen Küsten unter besonder Berücksichtigung der Polychaeten und Ostracoden. *Mitteilungen aus dem Hamburgischen zoologischen Museum und Institut* **1980**, *77*, 67-68.
80. Jeldes, F.; Lefevere, S. Annélides polychètes non pélagiques. *Second note: Polychètes sédentaires. Expédition Océanographique Belge dans les Eaux Côtières Africaines de l'Atlantique Sud (1948-1949)* **1959**, *4*, 1-40.
81. Blake, J.A. Polychaeta from the vicinity of deep-sea geothermal vents in the eastern Pacific. I. Euphrosinidae, Phyllodocidae, Hesionidae, Nereididae, Glyceridae, Dorvilleidae, Orbiniidae, and Maldanidae. *Bulletin of the Biological Society of Washington* **1985**, *6*, 67-101.
82. Monro, C. A note on a collection of Polychæta from the Eastern Mediterranean, with the description of a new species. *Annals and Magazine of Natural History, Series 10* **1937**, *19*, 82-86, doi:<https://doi.org/10.1080/00222933708655241>.
83. López, E. Familia Orbiniidae Hartman, 1942. In *Fauna Iberica. Annelida Polychaeta III*, Ramos, M.A., et al., Ed. Museo Nacional de Ciencias Naturales. CSIC: Madrid, 2012; Vol. 36, pp. 96-160.
84. Hartman, O. Deep-water benthic polychaetous annelids off New England to Bermuda and other North Atlantic areas. *Occasional Papers of the Allan Hancock Foundation* **1965**, *28*, 1-384.
85. Rozbaczylo, N.; Díaz-Díaz, O.; Cataldo, N. A new species of polychaete worm from Juan Fernández Archipelago, Chile, *Scoloplos juanfernandezensis* n. sp. (Polychaeta: Orbiniidae). *Latin american journal of aquatic research* **2017**, *45*, 203-208, doi:<http://dx.doi.org/10.3856/vol45-issue1-fulltext-21>
86. Oliveira, V.M.; Cutrim, A.S.; Vieira, A.K.M.; Ferreira, C.N.; Almeida, Z.S.; Nogueira Júnior, M. Description of *Scoloplos maranhensis* sp. nov. (Orbiniidae, Annelida) from tropical Brazilian mangrove. *Iheringia. Série Zoologia* **2019**, *109*, doi:<http://dx.doi.org/10.1590/1678-4766e2019009>
87. Southern, R. Polychaeta of the Chilka Lake and also of fresh and brackish waters in other parts of India. *Memoirs of the Indian Museum* **1921**, *5*, 563-659 pp., 632-634.

88. Mackie, A.S. A new species of Scoloplos (Polychaeta: Orbiniidae) from Hong Kong and a comparison with closely related Scoloplos marsupialis Southern, 1921 from India. *Asian Marine Biology* **1991**, 8, 35-44.
89. Rullier, F. Contribution à la faune des annélides polychaètes du Cameroun. *Bulletin de l'Institut Français d'Afrique Noire, Série A* **1964**, 26, 1071-1102.
90. Hernández-Alcántara, P.; Cortés-Solano, J.D.; Medina-Cantú, N.M.; Avilés-Díaz, A.L.; Solís-Weiss, V. Polychaete diversity in the estuarine habitats of Términos Lagoon, southern Gulf of Mexico. *Memoirs of Museum Victoria* **2014**, 71, 97-107.
91. Mirsa, A. Polychaete [Fauna of West Bengal]. In *Zoological Survey of India, Calcutta, Series 3. State Fauna Series, Fauna of West Bengal, part 10, Invertebrates*, Gosh, A.K., Ed. 1999; pp. 125-225.
92. Hutchings, P. Polychaeta of Wallis Lake, New South Wales. In *Proceedings of the Linnean Society of New South Wales*; pp. 175-195.
93. Brown, B. A redescription of Scoloplos simplex (Hutchings, 1974)(Polychaeta: Orbiniidae) from Australia. *Proceedings of the Biological Society of Washington* **1979**, 92, 762-768.
94. Day, J.H. New polychaeta from Beaufort: with a key to all species recorded from North Carolina. *NOAA Technical Reports, Ser. National Marine Fisheries Service, Circulars* **1973**, 375, 1-140, doi:<https://doi.org/10.5962/bhl.title.62852>.
95. Bellan, G. Polychaeta. In: Costello, M.J. et al. (Eds). *European register of marine species: a check-list of the marine species in Europe and a bibliography of guides to their identification. Collection Patrimoines Naturels* **2001**, 50, 214-231.
96. Savigny, J.C. Système des annelides, principalement de celles des côtes de l'Égypte et de la Syrie, offrant les caractères tant distinctifs que naturels des Ordres, Familles et Genres, avec la Description des Espèces. Description de l'Égypte. *Histoire Naturelle, Paris* **1822**, 1, 1-128.
97. Kirkegaard, J. *Havborsteorme II. Sedentaria*; Dansk Naturhistorisk Forening, Copenhagen, 1996; Vol. 86, pp. 451.
98. Sun, Y.; Li, X. Orbinia wui, a new species from China, with redescription of O. dicrochaeta Wu, 1962 (Annelida, Orbiniidae). *Zootaxa* **2018**, 4403, 351-364, doi:10.11646/zootaxa.4403.2.7.
99. Augener, H.; Michaelsen, W. Beiträge zur Kenntnis der Meeresfauna Westafrikas. *Polychaeta* **1918**, 2, 67-625.
100. Day, J.H. The Polychaeta of South Africa. Part 3. Sedentary species from cape shores and estuaries. *Zoological Journal of the Linnean Society* **1955**, 42, 407-452, doi: <http://dx.doi.org/10.1111/j.1096-3642.1955.tb02216.x>.
101. McIntosh, W.C. A monograph of the British annelids. Polychaeta. Syllidae to Ariciidae. *Ray Society of London* **1910**, 2, 233-524.
102. Fauvel, P. Polychètes Sédentaires. Addenda aux Errantes, Archiannélides, Myzostomaires. *Faune de France* **1927**, 16, 1-494.
103. Leão, L.S.; Santos, C.S. Orbina (Polychaeta: Orbiniidae) from the Brazilian coast: two new species and two new records. *Zootaxa* **2016**, 4105, 145-158, doi:10.11646/zootaxa.4105.2.3.
104. Rioja, E. Una nueva especie del genero Aricia (A. cornidei n. sp.) de la ria de Pontvedra (Anel. pol.). *Boletín de la Real Sociedad Española de Historia Natural* **1934**, 34, 433-438.
105. Averincev, V.G. The polychaete fauna of the Laptev Sea. *Issledovaniya fauny morei* **1999**, 37, 147-186.
106. Moore, J.P. Polychaetous annelids from Monterey Bay and San Diego, California. *Proceedings of the Academy of Natural Sciences of Philadelphia* **1909**, 61, 235-295.
107. Audouin, J.V.; Milne Edwards, H. Classification des Annélides, et description de celles qui habitent les côtes de la France. Part 4. *Annales des sciences naturelles* **1833**, 29, 338-412.

108. López, E.; Cladera, P.; San Martín, G. Orbiniidae polychaetes (Polychaeta: Scolecida) from Coiba Island, eastern Pacific of Panama, with description of a new species. *Revista de biología tropical* **2006**, *54*, 1307-1318.
109. Ehlers, E. Neuseeländische Anneliden II. *Abhandlungen der Königlichen Gesellschaft der Wissenschaften zu Göttingen. Mathematisch-Physikalische Klasse. Neue Folge* **1907**, *5*, 3-31.
110. Estcourt, I.N. Burrowing polychaete worms from a New Zealand estuary. *Transactions of the Royal Society of New Zealand* **1967**, *9*, 65-78.
111. Fabricius, O. Fauna Groenlandica, systematice sistens, Animalia Groenlandiae occidentalis hactenus indagata, quoad nomen specificum, triviale, vernaculumque; synonyma auctorum plurium, descriptionem, locum, victum, generationem, mores, usum, capturamque singuli; prout detegendi occasio fuit, maximaque parti secundum proprias observationes. *Hafniae et Lipsiae* **1780**, i-xvi, 1-452.
112. Hobson, K.D. Orbiniella nuda new species (Orbiniidae) and nine new records of other sedentary polychaetous annelids from Washington and British Columbia. *Canadian Journal of Zoology* **1974**, *52*, 69-75.
113. Müller, F. Einiges über die Annelidenfauna der Insel Santa Catharina an der brasilianischen Küste. *Archiv für Naturgeschichte* **1858**, *24*, 211-220.
114. Alvarez, R.C.; DA, V.R.M.; Dos, A.S.B. Redescription of Naineris aurantiaca (Müller, 1858) and designation of a neotype from the Brazilian coast (Annelida: Orbiniidae). *Zootaxa* **2019**, *4571*, zootaxa. 4571.4571. 4578-zootaxa. 4571.4571. 4578, doi:10.11646/zootaxa.4571.1.8
115. Carr, C.M.; Hardy, S.M.; Brown, T.M.; Macdonald, T.A.; Hebert, P.D. A tri-oceanic perspective: DNA barcoding reveals geographic structure and cryptic diversity in Canadian polychaetes. *PLoS One* **2011**, *6*, e22232, doi:10.1371/journal.pone.0022232.
116. Gravier, C. Sur les annélides polychètes rapportés par M. le Dr. Rivet, de Payta (Pérou). *Bulletin du Muséum d'Histoire Naturelle, Paris* **1908**, *14*, 40-44.
117. Annenkova, N. Die Polychaeten in den Sammlungen der jakutischen Expedition der Akademie der Wissenschaften der USSR. *Zoologischer Anzeiger* **1931**, *95*, 203-205.
118. Ivanova, M.; Kupina, N.; Tsurpalo, A. Macrobenthos of brackish-water intertidal areas of Dolphin Bay (Shikotan Island, the Kuril Islands). In *Proceedings of Oceanography of the Japan Sea: Proc. CREAMS-2000 Intern. Symp.* Vladivostok: Dalnauka; pp. 303-305.
119. Kostina, E.E.; Tsurpalo, A.P. Species composition and distribution of macrobenthos in the intertidal zone of Kunashir Island (South Kurile Islands), Russia. *Publications of the Seto Marine Biological Laboratory* **2016**, *44*, 53-133.
120. Imajima, M. Deep-sea benthic polychaetes off Pacific coast of the northern Honshu, Japan. In *Deep-sea Fauna and Pollutants off Pacific Coast of Northern Japan*, Fujita, T., Ed. National Museum of Nature and Science Monographs: 2009; Vol. 39, pp. 39-192.
121. De Silva, P.H.D.H. New species and records of Polychaeta from Ceylon. *Proceedings of the Zoological Society of London* **1965**, *144*, 537-563, doi:<http://dx.doi.org/10.1111/j.1469-7998.1965.tb05196.x>
122. Grube, A.E. Beschreibungen neuer oder wenig bekannter Anneliden. *Archiv für Naturgeschichte* **1855**, *21*, 81-136, plates III-V.
123. Al-Kandari, M.; Sattari, Z.; Hussain, S.; Radashevsky, V.I.; Zhadan, A. Checklist of intertidal polychaetes (Annelida) of Kuwait, Northern part of the Arabian Gulf. *Regional Studies in Marine Science* **2019**, *32*, 100872, doi:<https://doi.org/10.1016/j.rsma.2019.100872>.
124. Treadwell, A.L. New species of polychaetous annelids from California, Mexico, Porto Rico, and Jamaica. *American Museum Novitates* **1931**, *482*, 1-7.
125. Day, J.H. Israel South Red Sea Expedition, 1962, Reports no. 7. Some Polychaeta from the Israel South Red Sea Expedition, 1962. *Bulletin of the Sea Fisheries Research Station, Haifa* **1965**, *38*, 15-27.

126. Verrill, A.E. Additions to the Turbellaria, Nemertina, and Annelida of the Bermudas. *Transactions of the Connecticut Academy of Arts and Sciences* **1900**, *10*, 595-671.
127. Blake, J.; Giangrande, A. Naineris setosa (Verrill)(Polychaeta, Orbiniidae), an American subtropical–tropical polychaete collected from an aquaculture facility in Brindisi (Adriatic Sea, Italy): A possible alien species. *Italian Journal of Zoology* **2011**, *78*, 20-26, doi:<https://doi.org/10.1080/11250003.2011.577982>.
128. Pagliosa, P.R.; Doria, J.G.; Alves, G.F.; Almeida, T.d.; Lorenzi, L.; Netto, S.A.; Lana, P.d.C. Polychaetes from Santa Catarina State (southern Brazil): checklist and remarks on species distribution. *Zootaxa* **2012**, *3486*, 1-49.
129. Moore, J.P. Polychaeta from the coastal slope of Japan and from Kamchatka and Bering Sea. *Proceedings of the Academy of Natural Sciences of Philadelphia* **1903**, *55*, 401-490.
130. Claparède, É. Les annélides chétopodes du Golfe de Naples. *Mémoires de la Société de physique et d'histoire naturelle de Genève* **1868**, *19*, 313-584.
131. Orlandi, S. Di alcuni anellidi policheti del Mediterraneo. *Atti della Società Ligustica di Scienze Naturali e Geografiche* **1896**, *7*, 145-161.
132. Fauvel, P. Sur l'Arícia foetida, Claparède et ses variétés. *Bulletin de la Société Zoologique de France* **1924**, *49*, 518-528.
133. Badalamenti, F.; Castelli, A. Censimento dei policheti dei mari Italiani: Orbiniidae Hartman, 1942. *Atti della Società Toscana di Scienze Naturali, Memorie, Serie B* **1994**, *100*, 189-206.
134. Mohammad, M. Polychaete annelids from Kuwaitian islands, Arabian Gulf, with descriptions of four new species. *Zoological Journal of the Linnean Society* **1980**, *69*, 31-42.
135. Ehlers, E. Annulata nova vel minus cognita in Expeditione 'Porcupine' capta. *Annals and Magazine of Natural History. Series 4* **1874**, *13*, 292-298.
136. Mohammad, M. On two new polychaetous annelids from Kuwait. *Zoologischer Anzeiger* **1970**, *185*, 303-307.
137. Sars, G.O. Diagnoser af nye Annelider fra Christianiafjorden, efter Professor M. Sars's efterladte Manuskripter. *Forhandlinger i Videnskabs-Selskabet i Christiania* **1872**, *1871*, 406-417.
138. Dauvin, J.-C.; Dewarumez, J.-M.; Gentil, F. Liste actualisée des espèces d'Annélides Polychètes présentes en Manche. *Cahiers de Biologie Marine* **2003**, *44*, 67-95.
139. Moore, J.P. The polychaetous annelids dredged by the U.S.S. "Albatross" off the coast of Southern California in 1904. III. Euphrosynidae to Goniadidae. *Proceedings of the Academy of Natural Sciences of Philadelphia* **1911**, *63*, 234-318.
140. Day, J.H. The Polychaeta of Tristan da Cunha. *Results of the Norwegian Scientific Expedition to Tristan da Cunha* **1954**, *29*, 1-35 pp., 21.
141. Parapar, J.; Moreira, J.; Helgason, G.V. First record of genus Orbiniella Day, 1954 (Polychaeta: Orbiniidae) in North Atlantic Ocean with the description of a new species. *Zootaxa* **2015**, *4006*, 330.
142. Narayanaswamy, B.E.; Blake, J.A. A new species of Orbiniella (Polychaeta: Orbiniidae) from deep basins of Antarctica. *Marine Biological Association of the United Kingdom. Journal of the Marine Biological Association of the United Kingdom* **2005**, *85*, 843.
143. Branch, M.L. Four new species of Polychaeta from subantarctic Marion Island. *Annals of the South African Museum* **1998**, *105*, 249-265.
144. Gillet, P. A new species of Orbiniella (Orbiniidae: Polychaeta) from Marion Island, Indian Ocean. *Proceedings of Biological Society of Washington* **1999**, *112*, 592-597.
145. Buzhinskaya, G.N. Occurrence of Orbiniella plumisetosa sp. n. (Polychaeta: Orbiniidae) in the north-western Pacific Ocean and a key to species of the genus Orbiniella. *Explorations of the Fauna of the Seas* **1993**, *43*, 76-81.

146. Giere, O.E., Christer. A systematic account of the Questidae (Annelida, Polychaeta), with description of new taxa. *Zoologica Scripta* **1998**, 27, 345-360.
147. Salazar-Vallejo, S.I.; Carrera-Parra, L.F.; Muir, A.I.; de León-González, J.A.; Piotrowski, C.; Sato, M. Polychaete species (Annelida) described from the Philippine and China Seas. *Zootaxa* **2014**, 3842, 1-68, doi:<https://doi.org/10.11646/zootaxa.3842.1.1>.
148. Jamieson, B.; Webb, R. The morphology, spermatozoal ultrastructure and phylogenetic affinities of a new species of questid (Polychaeta, Annelida). In Proceedings of Proceedings of the 1st International Polychaete Conference, Sydney, Australia. Linnean Society of New South Wales, Sydney, Australia; pp. 21-34.
149. Giere, O.; Ebbe, B.; Erséus, C. Questa (Annelida, Polychaeta, Orbiniidae) from Pacific regions—new species and reassessment of the genus Periquesta. *Organisms Diversity & Evolution* **2008**, 7, 304-319, doi:<https://doi.org/10.1016/j.ode.2007.04.001>.
150. Westheide, W. Interstitielle Fauna von Galapagos. XXVI. Questidae, Cirratulidae, Acrocirridae, Ctenodrilidae (Polychaeta). *Mikrofauna des Meeresbodens* **1981**, 82, 6-8.
151. Hobson, K. Novaquesta trifurcata, a new genus and species of the family Questidae (Annelida, Polychaeta) from Cape Cod Bay, Massachusetts. *Proceedings of the Biological Society of Washington* **1970**, 83, 191-194.
152. Hartmann-Schröder, G. Zweiter Beitrag zur Polychaetenfauna von Peru. *Kieler Meeresforschungen* **1962**, 18, 109-147.
153. Hobson, K.D. Protoariciella oligobranchia new species (Orbiniidae) and six new records of Orbiniidae, Questidae, and Paraonidae (Annelida, Polychaeta) from British Columbia. *Canadian Journal of Zoology* **1976**, 54, 591-596.
154. Hartmann-Schröder, G. Zur Kenntnis des Eulitorals der afrikanischen Westküste zwischen Angola und Kap der Guten Hoffnung und der afrikanischen Ostküste von Südafrika und Mocambique unter besonderer Berücksichtigung der Polychaeten und Ostracoden. *Mitteilungen aus dem hamburgischen zoologischen Museum und Institut* **1974**, 69, 95-228.
155. Hartmann-Schröder, G. Zur Polychaetenfauna der Polynesischen Inseln Huahiné (Gesellschafts Inseln) und Rangiroa (Tuamotu-Inseln). *Mitteilungen aus dem Hamburgischen zoologischen Museum und Institut* **1992**, 89, 68.
156. Hartman, O. Abyssal polychaetous annelids from the Mozambique Basin off southeast Africa, with a compendium of abyssal polychaetous annelids from world-wide areas. *Journal of the Fisheries Board of Canada* **1971**, 28, 1407-1428.
157. Claparède, É. Glanures zootomiques parmi les annélides de Port-Vendres (Pyrénées Orientales). *Mémoires de la Société de Physique et d'Histoire Naturelle de Genève* **1864**, 17, 463-600 pp., 502-503.
158. Bobretzky, N. Материалы для фауны черного моря Аннелиды (Annelida, Polychaeta). *Zapiski Kievskogo obshchestva estestvoispytatelei* **1870**, 1, 188-274.
159. Solis-Weiss, V.; Fauchald, K. Orbiniidae (Annelida: Polychaeta) from mangrove root-mats in Belize, with a revision of protoariciin genera. *Proceedings of the Biological Society of Washington* **1989**, 102, 772-792.
160. Laubier, L. Schoederella pauliani gen. nov., sp. nov., un nouvel orbiniide (Polychètes sédentaires) de la faune interstitielle d'Afrique. *Annals of the Transvaal Museum* **1962**, 24, 231-238.
161. Laubier, L. Schroederella berkeleyi sp. n., un nouvel Orbiniidé (Polychète Sédentaire) de la faune interstitielle littorale du Massachusetts (USA). *Journal of the Fisheries Board of Canada* **1971**, 28, 1483-1486, doi: <http://dx.doi.org/10.1139/f71-227>.
162. Badalamenti, F.; Castelli, A. Schroederella laubieri, a new species of the subfamily protoariciinae (polychaeta, orbiniidae), with some notes on the genus schroederella laubier, 1962. *Italian Journal of Zoology* **1991**, 58, 95-98.



163. Gopal, A.; Koovapurath Useph, A.J.; Aikkarakunnath Varghese, S.; Veloorkirakathil Narayana, S. A new species of polychaete, *Pettibonella shompens* sp. nov. (Orbiniidae), from the Nicobar Islands, North Indian Ocean. *Marine Biology Research* **2014**, *10*, 1033-1037, doi:<https://doi.org/10.1080/17451000.2013.879988>.
164. Blake, J. A new genus of polychaete worm (Family Orbiniidae) from methane seeps in the Gulf of Mexico, with a review of the systematics and phylogenetic interrelationships of the genera of Orbiniidae. *Cahiers de Biologie Marine* **2000**, 435-449.
165. Van Gaest, A.L.; Young, C.M.; Young, J.J.; Helms, A.R.; Arellano, S.M. Physiological and behavioral responses of *Bathynnerita naticoidea* (Gastropoda: Neritidae) and *Methanoaricia dendrobranchiata* (Polychaeta: Orbiniidae) to hypersaline conditions at a brine pool cold seep. *Marine Ecology* **2007**, *28*, 199-207, doi:<https://doi.org/10.1111/j.1439-0485.2006.00147.x>.
166. Rullier, F. Quelques annélides polychètes de Cuba recueillies dans des éponges. *Travaux du Muséum d'Histoire Naturelle "Grigore Antipa"* **1974**, *14*, 9-77.
167. Day, J.H. The Polychaeta of Tristan da Cunha. *Results of the Norwegian Scientific Expedition to Tristan da Cunha* **1954**, *29*, 1-35 pp., 21.
168. Meyer, A.; Bleidorn, C.; Rouse, G.W.; Hausen, H. Morphological and molecular data suggest a cosmopolitan distribution of the polychaete *Proscoplos cygnochaetus* Day, 1954 (Annelida, Orbiniidae). *Mar. Biol.* **2008**, *153*, 879-889, doi:<https://doi.org/10.1007/s00227-007-0860-4>.
169. Hartmann-Schröder, G. Die Polychaeten der tropischen Nordwestküste Australiens (zwischen Derby im Norden und Port Hedland im Süden). *Mitteilungen aus dem Hamburgischen zoologischen Museum und Institut* **1979**, *76*, 77-218.
